# Supplementary material for: Pivotal Role of the Chromatin Protein Nupr1 in Kras-Induced Senescence and Transformation
Source: PubMed Central journal article supplement (PMC4663475; doi:10.1038/srep17549), 2015-11-30
Supplement: srep17549-s1.pdf [file srep17549-s1.pdf]

# Pivotal Role of the Chromatin Protein Nupr1 in Kras-Induced Senescence and Transformation

Daniel Grasso, Jennifer Bintz, Gwen Lomberk, Maria Ines Molejon, Celine Loncle, Maria Noé Garcia, Maria Belen Lopez, Raul Urrutia, Juan L Iovanna

## Supplementary information file

### Supplemental Figure 1

Nupr1 regulates *Dnmt1* promoter activity in Panc1 cells. **(A)** Cells were transfected with combinations of a *Dnmt1* promoter-Luc vector with siControl or siNupr1, and pSV40-RL as an internal control. After 48 h, luciferase activity was determined and expressed as the ratio of specific luciferase activity/internal standard. **(B)** Cells were transfected with combinations of a *Dnmt1* promoter-Luc vector with increasing amounts of pNupr1-Flag construct, and pSV40-RL as an internal control. After 24 h, luciferase activity was determined and expressed as the ratio of specific luciferase activity/internal standard. Means  $\pm$  SD; \* $p$ <0.05, \*\* $p$ <0.01.

### Supplemental Figure 2

Methylome analysis of siNupr1-treated MiaPaCa2 cells. Nupr1 depletion induces demethylation of 2026 genes and 887 newly methylated genes (left plot). Right plots show the number of genes related to the principals' clusters in methylated and demethylated genes.

### Supplemental Figure 3

RNA from MiaPaCa-2 cells treated with siControl and siNupr1 was prepared and expression of GLTSCR2, JAG2, HABP4, CREB5, DLX3, FAT4, CPSF1, TPM4, TOB1 and RNF4 mRNA was performed by RT-qPCR. Real-time quantitative PCR was performed in a Stratagene cyler using Takara reagents. Means  $\pm$  SD; \* $p$ <0.05, \*\* $p$ <0.01. ns = not significant.

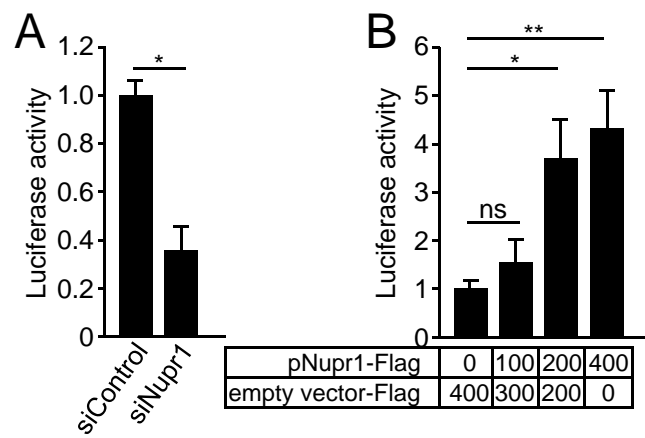

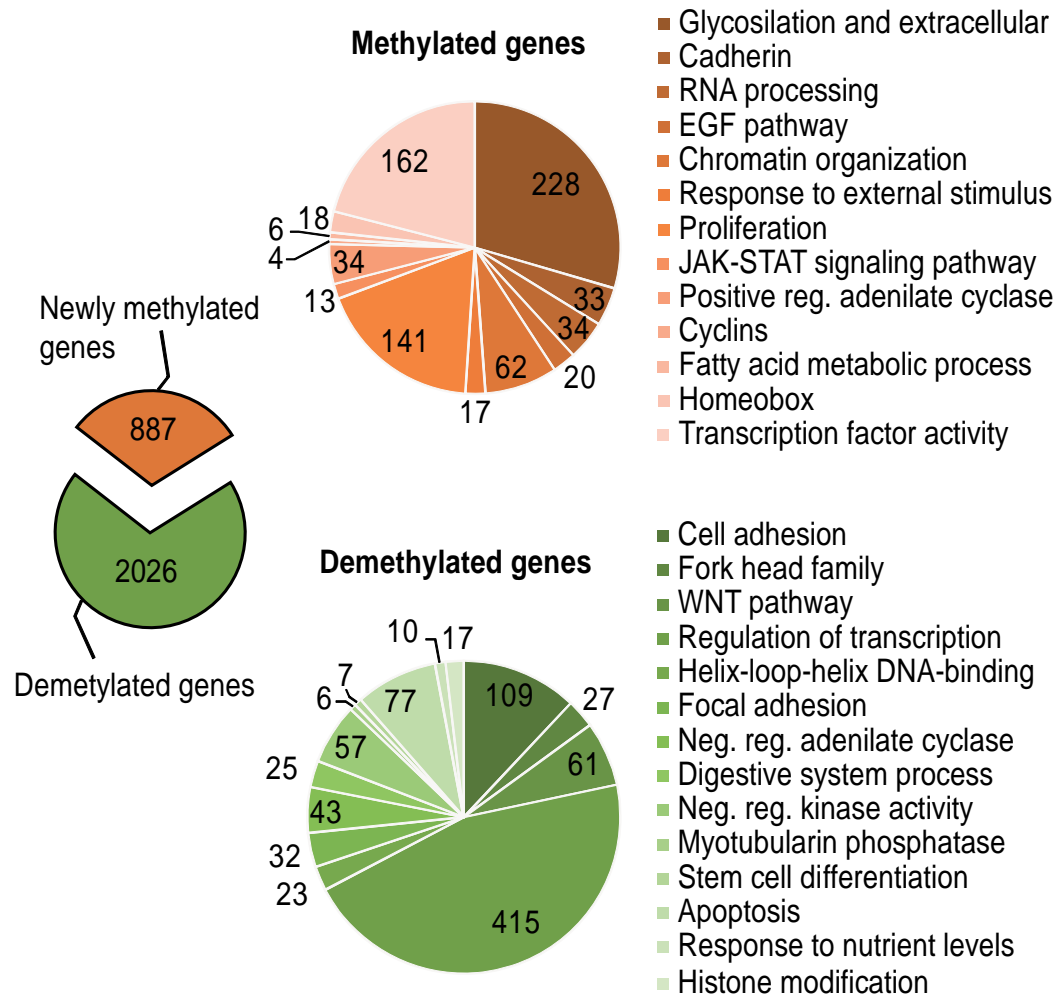

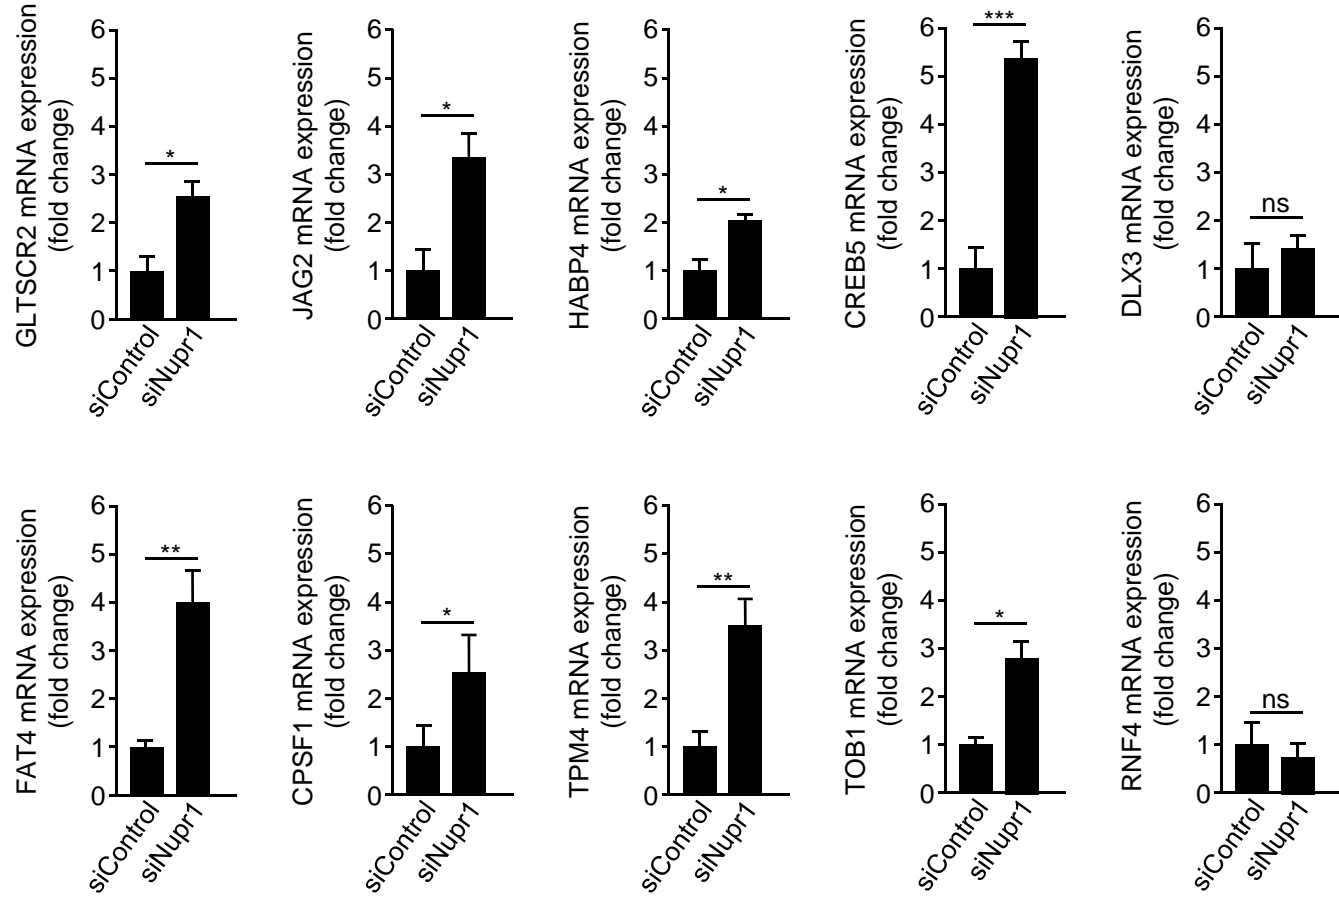

## Clustered demethylated genes in siNupr1-treated miaPaca2 cells.

| Annotation Cluster: CELL ADHESION |                                | Count | p Value  | Genes                                                                                                                                                                                                                                                                                                                                                                                                                                                                                                                                                                                                                                                                                                                                                                                 | Fold Enrichment |
|-----------------------------------|--------------------------------|-------|----------|---------------------------------------------------------------------------------------------------------------------------------------------------------------------------------------------------------------------------------------------------------------------------------------------------------------------------------------------------------------------------------------------------------------------------------------------------------------------------------------------------------------------------------------------------------------------------------------------------------------------------------------------------------------------------------------------------------------------------------------------------------------------------------------|-----------------|
| Category                          | Term                           |       |          |                                                                                                                                                                                                                                                                                                                                                                                                                                                                                                                                                                                                                                                                                                                                                                                       |                 |
| GOTERM_BP_FAT                     | GO:0007155~cell adhesion       | 93    | 7.77E-06 | PCDH7, AEBP1, MAEA, MYBPC2, CLDN4, PCDHA4, BCAR1, CASK, LMO7, EDL3, CD151, CXCL12, CHAD, CTNNB1, NRCAM, DAB1, SRPX, CNTNAP1, IZUMO1, DSCAM, CYR61, FGF4, EGFR, PCDH9B, PCDH8, MAG1, PCDH8, PCDH8, EFN81, PTPRT, CDH8, ADAP1, SPO, THY1, PCDHGB4, RND3, AMIGO3, HAS1, CNTN2, ROR2, ADAM12, PARVB, ITGA2B, EPDR1, PTK7, NIN2, PCDHGC5, ITG82, PCDHGC3, CDH3, CD72, SCRIB, PCDHAC1, ISLR, PVRL4, SORBS3, LGALS3BP, LAM82, COL7A1, FATA, PCDH816, MSLN, PSTPIP1, ACAN, PKD1, PCDH13, TECTA, FLRT2, FLRT1, HAPLN3, TNXB, MYF5, HSPG2, LGALS7, EFS, NID1, NID2, MCAM, PRP2, TP82, COL5A1, CDH13, LAMA4, CDH15, CDH16, NLGN4Y, HSPB11, PKP1, LAMAS, ITGA8, NLGN4X, NPHS1, ABL1, NTM, CDH11, RND3, AMIGO3, HAS1, CNTN2, ROR2, ADAM12, PARVB, ITGA2B, EPDR1, PTK7, NIN2, PCDHGC5, ITGA8, DPP4, | 1.58            |
| GOTERM_BP_FAT                     | GO:0022610~biological adhesion | 93    | 8.44E-06 |                                                                                                                                                                                                                                                                                                                                                                                                                                                                                                                                                                                                                                                                                                                                                                                       | 1.58            |
| SP_PIR_KEYWORDS                   | cell adhesion                  | 61    | 9.70E-06 |                                                                                                                                                                                                                                                                                                                                                                                                                                                                                                                                                                                                                                                                                                                                                                                       | 1.80            |
| GOTERM_BP_FAT                     | GO:0016337~cell-cell adhesion  | 37    | 0.005    |                                                                                                                                                                                                                                                                                                                                                                                                                                                                                                                                                                                                                                                                                                                                                                                       | 1.60            |

| Annotation Cluster: FORK HEAD FAMILY |                                                           | Count | p Value  | Genes                                                                                                                                                                                | Fold Enrichment |
|--------------------------------------|-----------------------------------------------------------|-------|----------|--------------------------------------------------------------------------------------------------------------------------------------------------------------------------------------|-----------------|
| Category                             | Term                                                      |       |          |                                                                                                                                                                                      |                 |
| INTERPRO                             | IPR018122:Transcription factor, fork head, conserved site | 13    | 3.96E-04 | FOXJ1, FOXJ1, FOXO3, FOXP4, FOXP1, FOXS1, FOXH1, FOXD4L2, FOXG1, FOXB2, FOXB1, FOXD4, FOXD3, PLEK2, HSFY2, E2F8, PAX2, ARID2, FEV, CUL3, FLI1, PAX7, EIF3K, EWSR1, RFX8, HSF1, IRF4, | 3.29            |
| INTERPRO                             | IPR001766:Transcription factor, fork head                 | 13    | 3.96E-04 |                                                                                                                                                                                      | 3.29            |
| UP_SEQ_FEATURE                       | DNA-binding region:Fork-head                              | 13    | 4.04E-04 |                                                                                                                                                                                      | 3.29            |
| SMART                                | SM00339:FH                                                | 13    | 9.84E-04 |                                                                                                                                                                                      | 2.96            |
| INTERPRO                             | IPR011991:Winged helix repressor DNA-binding              | 27    | 0.006    |                                                                                                                                                                                      | 1.75            |

| Annotation Cluster: WNT PATHWAY |                                                                       | Count | p Value  | Genes                                                                                                                                                                                                                                                                                                                                                                                                                     | Fold Enrichment |
|---------------------------------|-----------------------------------------------------------------------|-------|----------|---------------------------------------------------------------------------------------------------------------------------------------------------------------------------------------------------------------------------------------------------------------------------------------------------------------------------------------------------------------------------------------------------------------------------|-----------------|
| Category                        | Term                                                                  |       |          |                                                                                                                                                                                                                                                                                                                                                                                                                           |                 |
| KEGG_PATHWAY                    | hsa04916:Melanogenesis                                                | 22    | 3.32E-05 | PRKCA, WNT5A, TCF7, ADCY1, WNT10B, MAP2K1, ADCY6, FZD1, KIT, PRXK, XL1, FZD7, CTNNB1, LOC407835, EDNRB, PLCB3, MC1R, WNT9A, CALML5, PLCB1, WNT6, TUBB3, WNT8B, RAC3, FRAT1, PPP3CC, SOX17, NFATC1, PRKCA, CHP2, SKP1, DKK2, SFRP1, CCND2, TLE3, CPZ, DKK2, NXN, KREMEN1, SFRP4, WWOX, C1ORF187, BMP4, GLI1, ROR2, WNT5A, BMP4, WNT10B, TCF7, FZD1, WNT9A, WNT6, TCF7L1, FZD7, GLI1, CTNNB1, WNT8B, ROR2, BMP7, PRKX, IHH, | 2.72            |
| KEGG_PATHWAY                    | hsa04310:Wnt signaling pathway                                        | 25    | 0.001    |                                                                                                                                                                                                                                                                                                                                                                                                                           | 2.03            |
| SP_PIR_KEYWORDS                 | wnt signaling pathway                                                 | 20    | 0.004    |                                                                                                                                                                                                                                                                                                                                                                                                                           | 2.04            |
| KEGG_PATHWAY                    | hsa05217:Basal cell carcinoma                                         | 12    | 0.004    |                                                                                                                                                                                                                                                                                                                                                                                                                           | 2.67            |
| GOTERM_BP_FAT                   | GO:0016055~Wnt receptor signaling pathway                             | 19    | 0.029    |                                                                                                                                                                                                                                                                                                                                                                                                                           | 1.70            |
| KEGG_PATHWAY                    | hsa05217:Basal cell carcinoma                                         | 12    | 0.004    |                                                                                                                                                                                                                                                                                                                                                                                                                           | 2.67            |
| GOTERM_BP_FAT                   | GO:0007223~Wnt receptor signaling pathway, calcium modulating pathway | 6     | 0.027    |                                                                                                                                                                                                                                                                                                                                                                                                                           | 3.41            |
| KEGG_PATHWAY                    | hsa04340:Hedgehog signaling pathway                                   | 10    | 0.035    |                                                                                                                                                                                                                                                                                                                                                                                                                           | 2.19            |
| PIRSUPERFAMILY                  | PIRSF001784:int-1 transforming protein                                | 5     | 0.046    |                                                                                                                                                                                                                                                                                                                                                                                                                           | 3.57            |
| INTERPRO                        | IPR018161:Secreted growth factor Wnt protein, conserved site          | 5     | 0.066    |                                                                                                                                                                                                                                                                                                                                                                                                                           | 3.19            |
| INTERPRO                        | IPR005816:Secreted growth factor Wnt protein                          | 5     | 0.066    |                                                                                                                                                                                                                                                                                                                                                                                                                           | 3.19            |
| INTERPRO                        | IPR005817:Wnt superfamily                                             | 5     | 0.066    |                                                                                                                                                                                                                                                                                                                                                                                                                           | 3.19            |
| SMART                           | SM00097:WNT1                                                          | 5     | 0.089    |                                                                                                                                                                                                                                                                                                                                                                                                                           | 2.88            |

| Annotation Cluster: REGULATION OF TRANSCRIPTION |                                                       | Count | p Value  | Genes                                                                                                                                                                                                                                                                                                                                                                                                                                                                                                                                                                                                                                                                                                                                                                                                                                                                                                                                                                                                                                                                                                                                                                                                                                                                                                                                                                                                                                                                                                                                                                                                                                                                                                                                                                                                                                                                                                                                                                                                                                                                                                                                                                                                                                                                                                                                                                                                                                                                                                                                                                                                                                                                                                                                                                                                                             | Fold Enrichment |
|-------------------------------------------------|-------------------------------------------------------|-------|----------|-----------------------------------------------------------------------------------------------------------------------------------------------------------------------------------------------------------------------------------------------------------------------------------------------------------------------------------------------------------------------------------------------------------------------------------------------------------------------------------------------------------------------------------------------------------------------------------------------------------------------------------------------------------------------------------------------------------------------------------------------------------------------------------------------------------------------------------------------------------------------------------------------------------------------------------------------------------------------------------------------------------------------------------------------------------------------------------------------------------------------------------------------------------------------------------------------------------------------------------------------------------------------------------------------------------------------------------------------------------------------------------------------------------------------------------------------------------------------------------------------------------------------------------------------------------------------------------------------------------------------------------------------------------------------------------------------------------------------------------------------------------------------------------------------------------------------------------------------------------------------------------------------------------------------------------------------------------------------------------------------------------------------------------------------------------------------------------------------------------------------------------------------------------------------------------------------------------------------------------------------------------------------------------------------------------------------------------------------------------------------------------------------------------------------------------------------------------------------------------------------------------------------------------------------------------------------------------------------------------------------------------------------------------------------------------------------------------------------------------------------------------------------------------------------------------------------------------|-----------------|
| Category                                        | Term                                                  |       |          |                                                                                                                                                                                                                                                                                                                                                                                                                                                                                                                                                                                                                                                                                                                                                                                                                                                                                                                                                                                                                                                                                                                                                                                                                                                                                                                                                                                                                                                                                                                                                                                                                                                                                                                                                                                                                                                                                                                                                                                                                                                                                                                                                                                                                                                                                                                                                                                                                                                                                                                                                                                                                                                                                                                                                                                                                                   |                 |
| GOTERM_MF_FAT                                   | GO:0003700~transcription factor activity              | 115   | 2.01E-04 | MYOD1, STAT5A, HOXD12, FOXO3, CITED1, CTNNB1, TAF5L, FLI1, ZNF445, OLIG2, PITX2, SIX5, VAX1, MECOM, PROX1, SIX6, HOXD9, ASCL2, MTF1, HOXD3, FOXG1, EDF1, NFE2L1, SOX1, ANKRD30A, TFE3, MYE2, SRF, FOXH1, VDR, LHX1, HOXA7, ARNTL2, RUNX1, EWSR1, NFK2-2, SMAD9, GSK2, NR4A3, SMAD1, NEUROG3, MAFK, GAS7, FOXPA, VAV1, ZSCAN2, FOXP1, DLX3, HOXB1, RNF4, SALL1, MLX, DLX5, MZF1, KLF2, AEBP1, LZTS1, EVX1, HSFY2, EVX2, NR6A1, E2F8, ZNF154, FEV, GLI1, FOXS1, PAX7, POU4F3, SOX18, FOXB2, E4F1, FOXB1, RBPJL, BRD8, SNAPC2, FOXJ1, EGR4, OTX1, OTX2, ESR1, DMRT1, DMRT81, MSC, FOXD4L2, ZSCAN18, GLI3, IRX6, HGFCL1, NFIX, ZBTB16, TCF7L1, MSX2, TSC22D2, HINFP, BCL3, BCL6, SIM1, FOXD4, FOXD3, NFATC1, SIM2, MYF6, FOXL1, HSF1, TRIM29, TRIM28, MYF5, RCAN1, TBX1, CREB5, ISL1, VXS1, PKNOX2, IRF4, FSTL3, ZNF251, ZFP92, EPC1, TWIST1, YY2, ZNF507, TADA2B, ZNF648, C14ORF43, TOX2, PRDM8, BAZ1A, PTFR, HES4, ZNF785, ZNF382, CRTC2, ZNF517, CRTCL, FIGLA, ZNF74, TCF7, RYBP, KLF14, ZNF526, ZNF629, NOTCH3, TCEB3C, TCEB3B, TAF1C, ZNF534, ZFP41, ZNF296, ZNF295, RUM, ZNF677, FERD31, ZNF354, GMEB2, TLE3, ZNF143, ZNF689, CAND1, ZNF746, NSD1, ZNF276, PTOV1, ZNF275, ZFP64, ZNF467, ZNF558, ZNF324B, ZNF366, MLT1, BAZ2A, IRID2, ZNF720, ZNF667, ZNF669, ZNF664, PHF19, ZNF461, ZNF572, ZNF768, RBM4, TCEAL5, CBX2, OLIG3, MIER2, MYOCD, MIER3, TFB2M, ZNF576, MLL2, ARID18, GRHL2, SLM, ZNF433, SETD1A, KEAP1, CXCC1, OVOL1, SNF8, ZNF425, FEZ1, EBF2, ZNF418, HBP4, ZNF319, PAX2, PCGF3, PAX7, SOX18, SOX17, ZNF721, BANP, NPAS4, COBRRA1, EY4, FAM120B, ZNF710, INGS5, GLIS1, TRIB3, CTCL, PRDM16, ARID2, HIC2, PRDM15, NPAS3, BAH1, KAT2A, PPP1R13L, SETD7, FSTL3, ZNF629, POLR2T, POLR2L, POLR3E, HLF, CD3EAP, BCL6, DNAJB6, PTGES2, PSM29, JMY, PRPF6, DTX1, TOB1, C10ORF2, YB2, HSF2BP, PHRF2, RRAGC, SIRT7, TSNA, STRA13, FBXO18, AKAP8, HIST1H4K, PEG10, TXNDC12, GLI4, PCBP3, TOP3A, THAP4, MAP15, ZNF646, LIG1, PNKP, MYO18A, SPHK1, CCDC29, FBXL19, APTB2, PMS1, EGFR, LIN28A, RFX, ABL1, XP1, TRAK2, TRAK1, ZNF646, XLIF, PFN1, XBMP4, BMP3, MAP2K1, BMP7, CCDC79, IHH, JMY, SIGIRR, CARD11, SORBS3, FADS1, FZD1, SOD2, CASK, ABL1, TNFRSF4, BMP4, SNRNP70, CUL3, INTS6, FAM53A, STAG3, CCNA1, WWOX, CIZ1, LIG1, KIAA0649, PNKP, FBXL3, PNMA1, TP53TG3, ADAP1, PIPAN, UBASH3B, C19ORF22, RECQL5, DUSP23, LGALS7, CAMK2N2, SYNE2, PKP1, ATP2A3, LTC4S, SENP6, RRP18, NUBP2, FANCA, CENP, NOC2L, ANKRD23, STH, NAIF1, SSU72, NND1, IMP4, PMS1, MTUS1, NET1, FAM82A2, DYX1C1, NEIL1, TATDN2, PNPLA7, PMSA1, MAD2L1BP, BMP2K, DDX31, CAV2, DSCR6, STK11, SSH3, SIPA1, X, MAPKAPK3, TCL1A, ANAPC11, ZNF330, HNRNP, FBXW7, PTK6, EIF3K, STK19, EPB41, CINP, KCTD5, CDKN1A, NXN, KIF23, AKT1, OSR2, EPN3, NOL4, DYLN13, MID1IP1, RFWO2, SBF1, CHFR, CPSF1, KPNA1, GLTSCR2, BRSK1, ADPRHL2, RGS12, GCHFR, PARK2, CBS, | 1.39            |
| SP_PIR_KEYWORDS                                 | transcription regulation                              | 204   | 3.85E-04 |                                                                                                                                                                                                                                                                                                                                                                                                                                                                                                                                                                                                                                                                                                                                                                                                                                                                                                                                                                                                                                                                                                                                                                                                                                                                                                                                                                                                                                                                                                                                                                                                                                                                                                                                                                                                                                                                                                                                                                                                                                                                                                                                                                                                                                                                                                                                                                                                                                                                                                                                                                                                                                                                                                                                                                                                                                   | 1.26            |
| SP_PIR_KEYWORDS                                 | Transcription                                         | 207   | 4.90E-04 |                                                                                                                                                                                                                                                                                                                                                                                                                                                                                                                                                                                                                                                                                                                                                                                                                                                                                                                                                                                                                                                                                                                                                                                                                                                                                                                                                                                                                                                                                                                                                                                                                                                                                                                                                                                                                                                                                                                                                                                                                                                                                                                                                                                                                                                                                                                                                                                                                                                                                                                                                                                                                                                                                                                                                                                                                                   | 1.25            |
| GOTERM_MF_FAT                                   | GO:0030528~transcription regulator activity           | 163   | 7.26E-04 |                                                                                                                                                                                                                                                                                                                                                                                                                                                                                                                                                                                                                                                                                                                                                                                                                                                                                                                                                                                                                                                                                                                                                                                                                                                                                                                                                                                                                                                                                                                                                                                                                                                                                                                                                                                                                                                                                                                                                                                                                                                                                                                                                                                                                                                                                                                                                                                                                                                                                                                                                                                                                                                                                                                                                                                                                                   | 1.27            |
| GOTERM_BP_FAT                                   | GO:0006350~transcription                              | 214   | 0.001    |                                                                                                                                                                                                                                                                                                                                                                                                                                                                                                                                                                                                                                                                                                                                                                                                                                                                                                                                                                                                                                                                                                                                                                                                                                                                                                                                                                                                                                                                                                                                                                                                                                                                                                                                                                                                                                                                                                                                                                                                                                                                                                                                                                                                                                                                                                                                                                                                                                                                                                                                                                                                                                                                                                                                                                                                                                   | 1.21            |
| GOTERM_MF_FAT                                   | GO:0043565~sequence-specific DNA binding              | 73    | 0.002    |                                                                                                                                                                                                                                                                                                                                                                                                                                                                                                                                                                                                                                                                                                                                                                                                                                                                                                                                                                                                                                                                                                                                                                                                                                                                                                                                                                                                                                                                                                                                                                                                                                                                                                                                                                                                                                                                                                                                                                                                                                                                                                                                                                                                                                                                                                                                                                                                                                                                                                                                                                                                                                                                                                                                                                                                                                   | 1.42            |
| SP_PIR_KEYWORDS                                 | dna-binding                                           | 184   | 0.002    |                                                                                                                                                                                                                                                                                                                                                                                                                                                                                                                                                                                                                                                                                                                                                                                                                                                                                                                                                                                                                                                                                                                                                                                                                                                                                                                                                                                                                                                                                                                                                                                                                                                                                                                                                                                                                                                                                                                                                                                                                                                                                                                                                                                                                                                                                                                                                                                                                                                                                                                                                                                                                                                                                                                                                                                                                                   | 1.23            |
| GOTERM_MF_FAT                                   | GO:0003677~DNA binding                                | 232   | 0.004    |                                                                                                                                                                                                                                                                                                                                                                                                                                                                                                                                                                                                                                                                                                                                                                                                                                                                                                                                                                                                                                                                                                                                                                                                                                                                                                                                                                                                                                                                                                                                                                                                                                                                                                                                                                                                                                                                                                                                                                                                                                                                                                                                                                                                                                                                                                                                                                                                                                                                                                                                                                                                                                                                                                                                                                                                                                   | 1.17            |
| GOTERM_BP_FAT                                   | GO:0045449~regulation of transcription                | 252   | 0.006    |                                                                                                                                                                                                                                                                                                                                                                                                                                                                                                                                                                                                                                                                                                                                                                                                                                                                                                                                                                                                                                                                                                                                                                                                                                                                                                                                                                                                                                                                                                                                                                                                                                                                                                                                                                                                                                                                                                                                                                                                                                                                                                                                                                                                                                                                                                                                                                                                                                                                                                                                                                                                                                                                                                                                                                                                                                   | 1.15            |
| GOTERM_BP_FAT                                   | GO:0006355~regulation of transcription, DNA-dependent | 177   | 0.008    |                                                                                                                                                                                                                                                                                                                                                                                                                                                                                                                                                                                                                                                                                                                                                                                                                                                                                                                                                                                                                                                                                                                                                                                                                                                                                                                                                                                                                                                                                                                                                                                                                                                                                                                                                                                                                                                                                                                                                                                                                                                                                                                                                                                                                                                                                                                                                                                                                                                                                                                                                                                                                                                                                                                                                                                                                                   | 1.19            |
| GOTERM_BP_FAT                                   | GO:0051252~regulation of RNA metabolic process        | 178   | 0.014    |                                                                                                                                                                                                                                                                                                                                                                                                                                                                                                                                                                                                                                                                                                                                                                                                                                                                                                                                                                                                                                                                                                                                                                                                                                                                                                                                                                                                                                                                                                                                                                                                                                                                                                                                                                                                                                                                                                                                                                                                                                                                                                                                                                                                                                                                                                                                                                                                                                                                                                                                                                                                                                                                                                                                                                                                                                   | 1.17            |
| SP_PIR_KEYWORDS                                 | nucleus                                               | 363   | 0.126    |                                                                                                                                                                                                                                                                                                                                                                                                                                                                                                                                                                                                                                                                                                                                                                                                                                                                                                                                                                                                                                                                                                                                                                                                                                                                                                                                                                                                                                                                                                                                                                                                                                                                                                                                                                                                                                                                                                                                                                                                                                                                                                                                                                                                                                                                                                                                                                                                                                                                                                                                                                                                                                                                                                                                                                                                                                   | 1.06            |

| Annotation Cluster: HELIX-LOOP-HELIX DNA-BINDING |                                                           | Count | p Value | Genes                                                                                                                                                      | Fold Enrichment |
|--------------------------------------------------|-----------------------------------------------------------|-------|---------|------------------------------------------------------------------------------------------------------------------------------------------------------------|-----------------|
| Category                                         | Term                                                      |       |         |                                                                                                                                                            |                 |
| UP_SEQ_FEATURE                                   | domain:Helix-loop-helix motif                             | 19    | 0.004   | MYF6, MYOD1, MYF5, TFE3, FIGLA, NPAS4, NEUROG3, MSC, FERD3L, ASCL2, NPAS3, OLIG3, HES4, MLX, OLIG2, ARNTL2, SIM1, SIM2, TWIST1, EBF2, CREB5, MAFK, NFE2L1, | 2.06            |
| INTERPRO                                         | IPR001092:Basic helix-loop-helix dimerisation region bHLH | 19    | 0.005   |                                                                                                                                                            | 2.02            |
| SMART                                            | SM00353:HLH                                               | 19    | 0.015   |                                                                                                                                                            | 1.82            |

|                |                                        |    |       |      |
|----------------|----------------------------------------|----|-------|------|
| INTERPRO       | IPR011598:Helix-loop-helix DNA-binding | 14 | 0.019 | 2.02 |
| UP_SEQ_FEATURE | DNA-binding region:Basic motif         | 21 | 0.035 | 1.62 |

**Annotation Cluster: FOCAL ADHESION**

| Category      | Term                                        | Count | p Value | Genes                                                                                                                                                                                                                      | Fold Enrichment |
|---------------|---------------------------------------------|-------|---------|----------------------------------------------------------------------------------------------------------------------------------------------------------------------------------------------------------------------------|-----------------|
| GOTERM_CC_FAT | GO:0005912~adherens junction                | 24    | 0.003   | CAV2, ENAH, BCAR1, ASZ1, LMO7, KEAP1, EVL, AJAP1, CDH3, RHOU, APBB1IP, MLF2, SCRIB, CTNNB1, PVRL4, TNS3, SORBS3, LAYN, LASP1, EPB41L5, DSP, PAK1, PARVB, ITGA2B, PKP1, SHROOM4, CASK, AQP1, STK39, EGFR, SLC26A7, SLC16A8, | 1.91            |
| GOTERM_CC_FAT | GO:0070161~anchoring junction               | 25    | 0.006   |                                                                                                                                                                                                                            | 1.79            |
| GOTERM_CC_FAT | GO:0005925~focal adhesion                   | 16    | 0.017   |                                                                                                                                                                                                                            | 1.93            |
| GOTERM_CC_FAT | GO:0005924~cell-substrate adherens junction | 16    | 0.024   |                                                                                                                                                                                                                            | 1.86            |
| GOTERM_CC_FAT | GO:0030055~cell-substrate junction          | 16    | 0.037   |                                                                                                                                                                                                                            | 1.76            |
| GOTERM_CC_FAT | GO:0016323~basolateral plasma membrane      | 25    | 0.039   |                                                                                                                                                                                                                            | 1.52            |

**Annotation Cluster: NEGATIVE REGULATION OF ADENYLATE CYCLASE ACTIVITY**

| Category      | Term                                                                                | Count | p Value | Genes                                                                                                                                                                                                                                                                                                   | Fold Enrichment |
|---------------|-------------------------------------------------------------------------------------|-------|---------|---------------------------------------------------------------------------------------------------------------------------------------------------------------------------------------------------------------------------------------------------------------------------------------------------------|-----------------|
| GOTERM_BP_FAT | GO:0030814~regulation of cAMP metabolic process                                     | 18    | 0.005   | GNAZ, MCHRI, ADCY1, OPRL1, NF1, ADCY6, NPR3, TIMP2, CRHR1, EDNRB, SSTR5, GRM3, ADRB1, CHRM4, NTRK1, GRM7, NTRK2, GLP1R, HIST1H4K, GNA11, KISS1R, MCL1, HTR5A, TUBB3, EGFR, RXFP3, SPHK1, RCAN1, PCLO, GRM1, MCTP1, SSTR4, CRHR2, SSTR3, NPY, HTR6, TBXA2R, ITGA8, CACNA2D3, CACNG1, TPM4, PRKX, ITGA2B, | 2.08            |
| GOTERM_BP_FAT | GO:0045761~regulation of adenylate cyclase activity                                 | 17    | 0.006   |                                                                                                                                                                                                                                                                                                         | 2.11            |
| GOTERM_BP_FAT | GO:0031279~regulation of cyclase activity                                           | 17    | 0.008   |                                                                                                                                                                                                                                                                                                         | 2.05            |
| GOTERM_BP_FAT | GO:0030817~regulation of cAMP biosynthetic process                                  | 17    | 0.010   |                                                                                                                                                                                                                                                                                                         | 2.01            |
| GOTERM_BP_FAT | GO:0051339~regulation of lyase activity                                             | 17    | 0.010   |                                                                                                                                                                                                                                                                                                         | 2.01            |
| GOTERM_BP_FAT | GO:0030799~regulation of cyclic nucleotide metabolic process                        | 18    | 0.013   |                                                                                                                                                                                                                                                                                                         | 1.90            |
| GOTERM_BP_FAT | GO:0007194~negative regulation of adenylate cyclase activity                        | 11    | 0.015   |                                                                                                                                                                                                                                                                                                         | 2.38            |
| GOTERM_BP_FAT | GO:0031280~negative regulation of cyclase activity                                  | 11    | 0.015   |                                                                                                                                                                                                                                                                                                         | 2.38            |
| GOTERM_BP_FAT | GO:0051350~negative regulation of lyase activity                                    | 11    | 0.015   |                                                                                                                                                                                                                                                                                                         | 2.38            |
| GOTERM_BP_FAT | GO:0006140~regulation of nucleotide metabolic process                               | 18    | 0.016   |                                                                                                                                                                                                                                                                                                         | 1.85            |
| GOTERM_BP_FAT | GO:0030808~regulation of nucleotide biosynthetic process                            | 17    | 0.021   |                                                                                                                                                                                                                                                                                                         | 1.84            |
| GOTERM_BP_FAT | GO:0030802~regulation of cyclic nucleotide biosynthetic process                     | 17    | 0.021   |                                                                                                                                                                                                                                                                                                         | 1.84            |
| GOTERM_BP_FAT | GO:0019932~second-messenger-mediated signaling                                      | 30    | 0.023   |                                                                                                                                                                                                                                                                                                         | 1.52            |
| GOTERM_BP_FAT | GO:0019935~cyclic-nucleotide-mediated signaling                                     | 19    | 0.024   |                                                                                                                                                                                                                                                                                                         | 1.74            |
| GOTERM_BP_FAT | GO:0007193~inhibition of adenylate cyclase activity by G-protein signaling          | 8     | 0.046   |                                                                                                                                                                                                                                                                                                         | 2.38            |
| GOTERM_BP_FAT | GO:0019933~cAMP-mediated signaling                                                  | 14    | 0.053   |                                                                                                                                                                                                                                                                                                         | 1.76            |
| GOTERM_BP_FAT | GO:0007187~G-protein signaling, coupled to cyclic nucleotide second messenger       | 16    | 0.057   |                                                                                                                                                                                                                                                                                                         | 1.66            |
| GOTERM_BP_FAT | GO:0007188~G-protein signaling, coupled to cAMP nucleotide second messenger         | 11    | 0.173   |                                                                                                                                                                                                                                                                                                         | 1.54            |
| GOTERM_BP_FAT | GO:0045762~positive regulation of adenylate cyclase activity                        | 8     | 0.186   |                                                                                                                                                                                                                                                                                                         | 1.70            |
| GOTERM_BP_FAT | GO:0031281~positive regulation of cyclase activity                                  | 8     | 0.198   |                                                                                                                                                                                                                                                                                                         | 1.67            |
| GOTERM_BP_FAT | GO:0051349~positive regulation of lyase activity                                    | 8     | 0.223   |                                                                                                                                                                                                                                                                                                         | 1.62            |
| GOTERM_BP_FAT | GO:0007190~activation of adenylate cyclase activity                                 | 7     | 0.313   |                                                                                                                                                                                                                                                                                                         | 1.52            |
| KEGG_PATHWAY  | hsa05414:Dilated cardiomyopathy                                                     | 9     | 0.478   |                                                                                                                                                                                                                                                                                                         | 1.20            |
| GOTERM_BP_FAT | GO:0007189~activation of adenylate cyclase activity by G-protein signaling pathway  | 3     | 0.860   |                                                                                                                                                                                                                                                                                                         | 0.89            |
| GOTERM_BP_FAT | GO:0010578~regulation of adenylate cyclase activity involved in G-protein signaling | 3     | 0.860   |                                                                                                                                                                                                                                                                                                         | 0.89            |
| GOTERM_BP_FAT | GO:0010579~positive regulation of adenylate cyclase activity by G-protein signaling | 3     | 0.860   |                                                                                                                                                                                                                                                                                                         | 0.89            |

**Annotation Cluster: DIGESTIVE SYSTEM PROCESS**

| Category        | Term                                    | Count | p Value | Genes                                                                                                                                                              | Fold Enrichment |
|-----------------|-----------------------------------------|-------|---------|--------------------------------------------------------------------------------------------------------------------------------------------------------------------|-----------------|
| GOTERM_BP_FAT   | GO:0022600~digestive system process     | 9     | 0.006   | KCNMA1, VDR, KCNN4, SCT, LDLR, SLC26A7, STATH, IREB2, MUC6, SLC22A2, UGT1A6, UGT1A8, NPY, DPP3, LAP3, F12, AEBP1, PEPD, TRHDE, DPEP3, PGCP, CPA1, DPP6, DPP4, CPZ, | 3.16            |
| GOTERM_BP_FAT   | GO:0046541~saliva secretion             | 3     | 0.038   |                                                                                                                                                                    | 8.94            |
| GOTERM_BP_FAT   | GO:0007589~body fluid secretion         | 5     | 0.186   |                                                                                                                                                                    | 2.21            |
| GOTERM_BP_FAT   | GO:0007586~digestion                    | 11    | 0.231   |                                                                                                                                                                    | 1.44            |
| GOTERM_MF_FAT   | GO:0008238~exopeptidase activity        | 12    | 0.059   |                                                                                                                                                                    | 1.84            |
| GOTERM_MF_FAT   | GO:0004177~aminopeptidase activity      | 6     | 0.106   |                                                                                                                                                                    | 2.36            |
| SP_PIR_KEYWORDS | Aminopeptidase                          | 4     | 0.347   |                                                                                                                                                                    | 1.92            |
| GOTERM_MF_FAT   | GO:0008235~metalloexopeptidase activity | 7     | 0.098   |                                                                                                                                                                    | 2.17            |

|                 |                                             |   |       |  |      |
|-----------------|---------------------------------------------|---|-------|--|------|
| GOTERM_MF_FAT   | GO:0004181~metallocarboxypeptidase activity | 5 | 0.157 |  | 2.36 |
| GOTERM_MF_FAT   | GO:0004180~carboxypeptidase activity        | 5 | 0.385 |  | 1.59 |
| INTERPRO        | IPR000834:Peptidase M14, carboxypeptidase A | 3 | 0.576 |  | 1.58 |
| SMART           | SM00631:Zn_pept                             | 3 | 0.634 |  | 1.43 |
| SP_PIR_KEYWORDS | carboxypeptidase                            | 3 | 0.739 |  | 1.17 |

**Annotation Cluster: NEGATIVE REGULATION OF KINASE ACTIVITY**

| Category      | Term                                                      | Count | p Value | Genes                                                                                                                                                                                                                                                                                                                                                                                                      | Fold Enrichment |
|---------------|-----------------------------------------------------------|-------|---------|------------------------------------------------------------------------------------------------------------------------------------------------------------------------------------------------------------------------------------------------------------------------------------------------------------------------------------------------------------------------------------------------------------|-----------------|
| GOTERM_BP_FAT | GO:0043086~negative regulation of catalytic activity      | 34    | 0.025   | GNAS, MCHR1, ADCY1, ADCY6, PRKAG2, TRIB3, ANAPC11, AKT1, EDNRB, PCSK9, MLLT1, GCHFR, BUB3, PSMD9, PRKCA, ANAPC5, OPR11, NF1, NEIL1, CRIPAK, NPR3, THY1, SH3BP5, PSM1, SSTR5, GRM3, CDKN1A, CHRMA, GRM7, TSC2, ZFYVE28, CAND1, DNAIB6, DUSP6, CCK, MAP4K1, KIT, TNFRSF4, S1PR2, KISS1R, DAB1, DGKE, DIRAS3, PAK1, FRS2, EGFR, MAP2K1, SPHK1, STRADB, GRM1, CARD10, LRP1, CCND2, CD81, MAPK8IP3, CBS, VLDLR, | 1.46            |
| GOTERM_BP_FAT | GO:0006469~negative regulation of protein kinase activity | 13    | 0.059   |                                                                                                                                                                                                                                                                                                                                                                                                            | 1.78            |
| GOTERM_BP_FAT | GO:0045859~regulation of protein kinase activity          | 38    | 0.071   |                                                                                                                                                                                                                                                                                                                                                                                                            | 1.31            |
| GOTERM_BP_FAT | GO:0033673~negative regulation of kinase activity         | 13    | 0.072   |                                                                                                                                                                                                                                                                                                                                                                                                            | 1.72            |
| GOTERM_BP_FAT | GO:0051348~negative regulation of transferase activity    | 13    | 0.105   |                                                                                                                                                                                                                                                                                                                                                                                                            | 1.61            |

**Annotation Cluster: MYOTUBULARIN PHOSPHATASE**

| Category       | Term                               | Count | p Value | Genes                                   | Fold Enrichment |
|----------------|------------------------------------|-------|---------|-----------------------------------------|-----------------|
| INTERPRO       | IPR004182:GRAM                     | 5     | 0.066   | MTMR1, SBF1, SBF2, TBC1D9, WBP2, MTMR9, | 3.19            |
| SMART          | SM00568:GRAM                       | 5     | 0.089   |                                         | 2.88            |
| UP_SEQ_FEATURE | domain:Myotubularin phosphatase    | 4     | 0.098   |                                         | 3.54            |
| INTERPRO       | IPR010569:Myotubularin-related     | 4     | 0.102   |                                         | 3.47            |
| INTERPRO       | IPR017906:Myotubularin phosphatase | 4     | 0.102   |                                         | 3.47            |
| UP_SEQ_FEATURE | domain:GRAM                        | 4     | 0.115   |                                         | 3.30            |

**Annotation Cluster: STEM CELL DIFFERENTIATION**

| Category      | Term                                 | Count | p Value | Genes                                       | Fold Enrichment |
|---------------|--------------------------------------|-------|---------|---------------------------------------------|-----------------|
| GOTERM_BP_FAT | GO:0048863~stem cell differentiation | 7     | 0.047   | LIF, PAX7, TCL1A, KIT, LIN28A, TCF7L1, FG4, | 2.61            |
| GOTERM_BP_FAT | GO:0019827~stem cell maintenance     | 5     | 0.153   |                                             | 2.38            |
| GOTERM_BP_FAT | GO:0048864~stem cell development     | 5     | 0.169   |                                             | 2.29            |

**Annotation Cluster: APOPTOSIS**

| Category      | Term                                                    | Count | p Value | Genes                                                                                                                                                                                                                                                                                                                                                                                                                                                                                                                                       | Fold Enrichment |
|---------------|---------------------------------------------------------|-------|---------|---------------------------------------------------------------------------------------------------------------------------------------------------------------------------------------------------------------------------------------------------------------------------------------------------------------------------------------------------------------------------------------------------------------------------------------------------------------------------------------------------------------------------------------------|-----------------|
| GOTERM_BP_FAT | GO:0010942~positive regulation of cell death            | 46    | 0.082   | CCK, MMP9, ZBTB16, FOXO3, SCRIB, MCF2L, GCH1, MSX2, CUL3, AKT1, VDR, BOK, TNFRSF19, PCSK9, PPP3CC, BCL3, BCL6, MX1, CD5, WWOX, NET1, KCNMA1, BMP4, PRKCA, ARHGGEF4, OBSCN, ARHGGEF2, ARHGGEF18, NF1, CIDEA, GAL, VAV1, DAPK1, JMY, PLEKHF1, TXNDC12, CDKN1A, UNC13D, SSTR3, RASGRF2, RASGRF1, NAI1, BIK, ABL1, BMP7, DAP3, MAEA, SNCB, STAT5A, BCAR1, JAG2, PAX2, EDNRB, , PAX7, DDAH2, FGF4, IHH, NMNAT3, EGFR, ESR1, CARD10, CARD11, NME5, TNFAIP8, MYO18A, KIT, TNFRSF4, CARD9, SPHK1, PDE3A, STRADB, SOD2, CDH13, SFRP1, NTRK1, DNAIB6, | 1.26            |
| GOTERM_BP_FAT | GO:0043065~positive regulation of apoptosis             | 45    | 0.093   |                                                                                                                                                                                                                                                                                                                                                                                                                                                                                                                                             | 1.25            |
| GOTERM_BP_FAT | GO:0043068~positive regulation of programmed cell death | 45    | 0.105   |                                                                                                                                                                                                                                                                                                                                                                                                                                                                                                                                             | 1.24            |
| GOTERM_BP_FAT | GO:0006917~induction of apoptosis                       | 33    | 0.169   |                                                                                                                                                                                                                                                                                                                                                                                                                                                                                                                                             | 1.23            |
| GOTERM_BP_FAT | GO:0012502~induction of programmed cell death           | 33    | 0.173   |                                                                                                                                                                                                                                                                                                                                                                                                                                                                                                                                             | 1.23            |
| GOTERM_BP_FAT | GO:0010941~regulation of cell death                     | 76    | 0.203   |                                                                                                                                                                                                                                                                                                                                                                                                                                                                                                                                             | 1.11            |
| GOTERM_BP_FAT | GO:0043067~regulation of programmed cell death          | 75    | 0.235   |                                                                                                                                                                                                                                                                                                                                                                                                                                                                                                                                             | 1.10            |
| GOTERM_BP_FAT | GO:0042981~regulation of apoptosis                      | 73    | 0.289   |                                                                                                                                                                                                                                                                                                                                                                                                                                                                                                                                             | 1.08            |
| GOTERM_BP_FAT | GO:0043069~negative regulation of programmed cell death | 29    | 0.685   |                                                                                                                                                                                                                                                                                                                                                                                                                                                                                                                                             | 0.96            |
| GOTERM_BP_FAT | GO:0060548~negative regulation of cell death            | 29    | 0.690   |                                                                                                                                                                                                                                                                                                                                                                                                                                                                                                                                             | 0.96            |
| GOTERM_BP_FAT | GO:0043066~negative regulation of apoptosis             | 27    | 0.789   |                                                                                                                                                                                                                                                                                                                                                                                                                                                                                                                                             | 0.91            |
| GOTERM_BP_FAT | GO:0006916~anti-apoptosis                               | 14    | 0.890   |                                                                                                                                                                                                                                                                                                                                                                                                                                                                                                                                             | 0.81            |

**Annotation Cluster: RESPONSE TO NUTRIENT LEVELS**

| Category      | Term                                                   | Count | p Value | Genes                                                                      | Fold Enrichment |
|---------------|--------------------------------------------------------|-------|---------|----------------------------------------------------------------------------|-----------------|
| GOTERM_BP_FAT | GO:0031668~cellular response to extracellular stimulus | 8     | 0.288   | VDR, CYP24A1, CDKN1A, MYOCD, MAP1LC3A, FADS1, PCSK9, CTSD, UGT1A6, UGT1A8, | 1.49            |
| GOTERM_BP_FAT | GO:0031669~cellular response to nutrient levels        | 6     | 0.308   |                                                                            | 1.63            |
| GOTERM_BP_FAT | GO:0042594~response to starvation                      | 5     | 0.473   |                                                                            | 1.42            |
| GOTERM_BP_FAT | GO:0009267~cellular response to starvation             | 4     | 0.510   |                                                                            | 1.49            |

**Annotation Cluster: HISTONE MODIFICATION**

| Category      | Term                                    | Count | p Value | Genes                                                                                                             | Fold Enrichment |
|---------------|-----------------------------------------|-------|---------|-------------------------------------------------------------------------------------------------------------------|-----------------|
| GOTERM_BP_FAT | GO:0043543~protein amino acid acylation | 8     | 0.235   | ING5, NMT2, KAT2A, EPC1, TAF5L, IRF4, MAP6D1, BRD8, PRMT8, RBM4, CTCFL, NSD1, BAZ2A, POLR2L, INTS6, EDF1, ZNF768, | 1.59            |

|               |                                                       |    |       |
|---------------|-------------------------------------------------------|----|-------|
| GOTERM_BP_FAT | GO:0043966~histone H3 acetylation                     | 4  | 0.374 |
| GOTERM_BP_FAT | GO:0016573~histone acetylation                        | 6  | 0.376 |
| GOTERM_BP_FAT | GO:0006473~protein amino acid acetylation             | 6  | 0.444 |
| GOTERM_BP_FAT | GO:0043967~histone H4 acetylation                     | 3  | 0.509 |
| GOTERM_BP_FAT | GO:0016570~histone modification                       | 11 | 0.577 |
| GOTERM_CC_FAT | GO:0000123~histone acetyltransferase complex          | 5  | 0.586 |
| GOTERM_BP_FAT | GO:0016569~covalent chromatin modification            | 11 | 0.619 |
| GOTERM_MF_FAT | GO:0004468~lysine N-acetyltransferase activity        | 4  | 0.636 |
| GOTERM_MF_FAT | GO:0004402~histone acetyltransferase activity         | 4  | 0.636 |
| GOTERM_CC_FAT | GO:0016591~DNA-directed RNA polymerase II, holoenzyme | 6  | 0.796 |

|      |
|------|
| 1.83 |
| 1.49 |
| 1.38 |
| 1.79 |
| 1.07 |
| 1.23 |
| 1.04 |
| 1.24 |
| 1.24 |
| 0.91 |



### Clustered methylated genes in siNupr1-treated miaPaca2 cells.

| Annotation Cluster: GLYCOSYLATION AND EXTRACELLULAR REGION |                                                 | Count | p Value  | Genes                                                                                                                                                                                                                                                                                                                                                                                                                                                                                                                                                                                                                                                                                                                                                                                                                                                                                                                                                                                                                                                                                                                                                                                                                                                                                                                                                                                                                                                                                                                                                                                                                                                                                                | Fold Enrichment |
|------------------------------------------------------------|-------------------------------------------------|-------|----------|------------------------------------------------------------------------------------------------------------------------------------------------------------------------------------------------------------------------------------------------------------------------------------------------------------------------------------------------------------------------------------------------------------------------------------------------------------------------------------------------------------------------------------------------------------------------------------------------------------------------------------------------------------------------------------------------------------------------------------------------------------------------------------------------------------------------------------------------------------------------------------------------------------------------------------------------------------------------------------------------------------------------------------------------------------------------------------------------------------------------------------------------------------------------------------------------------------------------------------------------------------------------------------------------------------------------------------------------------------------------------------------------------------------------------------------------------------------------------------------------------------------------------------------------------------------------------------------------------------------------------------------------------------------------------------------------------|-----------------|
| UP_SEQ_FEATURE                                             | glycosylation site:N-linked (GlcNAc...)         | 180   | 8.61E-04 | KERA, PTGS2, LTBP3, PDGFA, C20ORF103, OVCH2, TLR3, POSTN, GRIN3A, TSPAN9, MMRN1, CNGB3, CDH22, ADAM2, ORG1, GXYLT1, LPHN1, B3GALT1, P15, CLRN3, MF12, OR5M3, IL22, GABRR3, TNFAIP6, ORSH14, F3, ASPHD2, HTR7, OR13F1, TMPRSS11B, PTGFRN, IBSP, NAGLU, SCN1A, GAL3ST4, SLC38A2, CYS1TR1, DRD2, TMEM81, OR2T4, OR11G2, UMOD, OR2L3, OR8U1, GREM2, ITGB1, ZPLD1, KDELC1, FGG, PVRL1, BCE, TEK, B3GNT6, SCN9A, PCDA10, ENTPD6, FGL2, EGF, OLFM1, FAM55D, MEST, FCER1A, PTH2R, ACER1, MGAT4C, ITGA1, SLC6A15, MSTN, TM2D3, EMILIN3, SERPINI2, EPHA3, HYOU1, TMEM117, OR1202, ATP13A1, OR6K3, WIF1, AREG, OR8D2, MTNR1A, C9ORF11, PNLI1, NXP2, OR10A4, PCDA9, NDST4, ARSE, OR52A1, NXP4, ITIH5L, HEXA, PCDA5, ANO1, ORAK17, ARSK, OR10A7, TOR3A, OR4C16, OR4C15, OR9K2, TNFRSF11A, RSPD1, OR2T10, OR14J1, TGFA, OR6G1, METTL9, GPR174, HVAL2, ADAM10, RNF1, CNTNAP4, NRXN3, PCDHG87, MESDC2, OXGR1, SLC7A11, LY2L1, LY2L2, ACVR2B, KIAA1199, GRM7, CTSO, ORSV1, ORANS, ORSH6, ADAM15, CD101, OR8H3, CS, GPPA1, TSHB, PCDHB12, DCN, EDEM1, SCARF2, LUNGO2, GSF11, GPM6A, LRRTM4, TSPAN33, PKD2, ORS812, TOR1B, SLC4A7, PKD1, CCBP2, HTR3B, LY75, OR9G9, FAM174A, SLC12A1, ILS, FLT3, B3GALT1, SI, SUN2, TSPAN14, EDA2R, OR9G1, NPY1R, COL5A2, KIAA0564, FZD6, ORST3, CDH12, RNF43, AFP, DKK1, LIPK, EPGN, CDH17, CDH18, CDH19, KREMEN1, GPR113, SUMP1, OR10Q1, CD302, OR6X1, CD40LG, ODAM, REG1A, CSN3, AADA2L, X, HTRA1, XORF53, SLITRK1, RBP4, ADCYAP1, SPP2, CXCL13, INSL5, PRDX4, CCL3L3, TGFA, FAM24B, FAM24A, AMBN, MAGT1, C1QL3, VOPP1, SMR3B, CXCL1, MGMT1, TAC1, C1QTNF7, PRRG4, NMU, IL8, BMPR1B, C4ORF7, RCN2, IL18, GPI, ZFP91, CNTF, CMTM7, HDLBP, VASH1, SCGN, KRTAP1-1, X, KRTAP1-3, HDLBPX, | 1.24            |
| SP_PIR_KEYWORDS                                            | glycoprotein                                    | 184   | 0.002    |                                                                                                                                                                                                                                                                                                                                                                                                                                                                                                                                                                                                                                                                                                                                                                                                                                                                                                                                                                                                                                                                                                                                                                                                                                                                                                                                                                                                                                                                                                                                                                                                                                                                                                      | 1.22            |
| SP_PIR_KEYWORDS                                            | signal                                          | 139   | 0.002    |                                                                                                                                                                                                                                                                                                                                                                                                                                                                                                                                                                                                                                                                                                                                                                                                                                                                                                                                                                                                                                                                                                                                                                                                                                                                                                                                                                                                                                                                                                                                                                                                                                                                                                      | 1.22            |
| UP_SEQ_FEATURE                                             | signal peptide                                  | 139   | 0.008    |                                                                                                                                                                                                                                                                                                                                                                                                                                                                                                                                                                                                                                                                                                                                                                                                                                                                                                                                                                                                                                                                                                                                                                                                                                                                                                                                                                                                                                                                                                                                                                                                                                                                                                      | 1.22            |
| GOTERM_MF_FAT                                              | GO:0005125~cytokine activity                    | 15    | 0.011    |                                                                                                                                                                                                                                                                                                                                                                                                                                                                                                                                                                                                                                                                                                                                                                                                                                                                                                                                                                                                                                                                                                                                                                                                                                                                                                                                                                                                                                                                                                                                                                                                                                                                                                      | 2.12            |
| SP_PIR_KEYWORDS                                            | cytokine                                        | 13    | 0.025    |                                                                                                                                                                                                                                                                                                                                                                                                                                                                                                                                                                                                                                                                                                                                                                                                                                                                                                                                                                                                                                                                                                                                                                                                                                                                                                                                                                                                                                                                                                                                                                                                                                                                                                      | 2.06            |
| GOTERM_CC_FAT                                              | GO:0005615~extracellular space                  | 35    | 0.036    |                                                                                                                                                                                                                                                                                                                                                                                                                                                                                                                                                                                                                                                                                                                                                                                                                                                                                                                                                                                                                                                                                                                                                                                                                                                                                                                                                                                                                                                                                                                                                                                                                                                                                                      | 1.41            |
| KEGG_PATHWAY                                               | hsa04060:Cytokine-cytokine receptor interaction | 16    | 0.059    |                                                                                                                                                                                                                                                                                                                                                                                                                                                                                                                                                                                                                                                                                                                                                                                                                                                                                                                                                                                                                                                                                                                                                                                                                                                                                                                                                                                                                                                                                                                                                                                                                                                                                                      | 1.64            |
| SP_PIR_KEYWORDS                                            | Secreted                                        | 71    | 0.072    |                                                                                                                                                                                                                                                                                                                                                                                                                                                                                                                                                                                                                                                                                                                                                                                                                                                                                                                                                                                                                                                                                                                                                                                                                                                                                                                                                                                                                                                                                                                                                                                                                                                                                                      | 1.20            |
| GOTERM_CC_FAT                                              | GO:0005576~extracellular region                 | 83    | 0.123    |                                                                                                                                                                                                                                                                                                                                                                                                                                                                                                                                                                                                                                                                                                                                                                                                                                                                                                                                                                                                                                                                                                                                                                                                                                                                                                                                                                                                                                                                                                                                                                                                                                                                                                      | 1.14            |
| GOTERM_CC_FAT                                              | GO:0044421~extracellular region part            | 42    | 0.146    |                                                                                                                                                                                                                                                                                                                                                                                                                                                                                                                                                                                                                                                                                                                                                                                                                                                                                                                                                                                                                                                                                                                                                                                                                                                                                                                                                                                                                                                                                                                                                                                                                                                                                                      | 1.21            |

| Annotation Cluster: CADHERIN |                                       | Count | p Value | Genes                                                                                                                                                                                                                                           | Fold Enrichment |
|------------------------------|---------------------------------------|-------|---------|-------------------------------------------------------------------------------------------------------------------------------------------------------------------------------------------------------------------------------------------------|-----------------|
| GOTERM_BP_FAT                | GO:0007156~homophilic cell adhesion   | 13    | 0.003   | PCDH9, PCDA5, PCDHG87, PCDHB12, ITGB1, CDH22, CDH12, PVRL1, CDH17, CDH18, CDH19, PKD1, PCDA10, CLDN18, SCARF2, BARX2, CD40LG, TEK, BMPR1B, IBSP, CNTNAP4, NRXN3, ITGA1, POSTN, IGSF11, ARVCF, TNFAIP6, ADAM2, PPIA1, MMRN1, PKD2, AMBN, ADAM15, | 2.77            |
| UP_SEQ_FEATURE               | domain:Cadherin 5                     | 10    | 0.006   |                                                                                                                                                                                                                                                 | 2.99            |
| UP_SEQ_FEATURE               | domain:Cadherin 3                     | 10    | 0.010   |                                                                                                                                                                                                                                                 | 2.79            |
| UP_SEQ_FEATURE               | domain:Cadherin 4                     | 10    | 0.010   |                                                                                                                                                                                                                                                 | 2.79            |
| GOTERM_BP_FAT                | GO:0016337~cell-cell adhesion         | 19    | 0.010   |                                                                                                                                                                                                                                                 | 1.92            |
| SMART                        | SM00112:CA                            | 10    | 0.011   |                                                                                                                                                                                                                                                 | 2.72            |
| UP_SEQ_FEATURE               | domain:Cadherin 1                     | 10    | 0.012   |                                                                                                                                                                                                                                                 | 2.71            |
| UP_SEQ_FEATURE               | domain:Cadherin 2                     | 10    | 0.012   |                                                                                                                                                                                                                                                 | 2.71            |
| INTERPRO                     | IPR002126:Cadherin                    | 10    | 0.013   |                                                                                                                                                                                                                                                 | 2.65            |
| INTERPRO                     | IPR000233:Cadherin cytoplasmic region | 4     | 0.027   |                                                                                                                                                                                                                                                 | 6.04            |
| PIR_SUPERFAMILY              | PIRSF002504:cadherin                  | 4     | 0.040   |                                                                                                                                                                                                                                                 | 5.14            |
| SP_PIR_KEYWORDS              | cell adhesion                         | 22    | 0.066   |                                                                                                                                                                                                                                                 | 1.49            |
| GOTERM_BP_FAT                | GO:0022610~biological adhesion        | 33    | 0.090   |                                                                                                                                                                                                                                                 | 1.32            |
| GOTERM_BP_FAT                | GO:0007155~cell adhesion              | 33    | 0.092   |                                                                                                                                                                                                                                                 | 1.32            |
| UP_SEQ_FEATURE               | domain:Cadherin 6                     | 6     | 0.113   |                                                                                                                                                                                                                                                 | 2.34            |
| INTERPRO                     | IPR013164:Cadherin, N-terminal        | 5     | 0.143   |                                                                                                                                                                                                                                                 | 2.47            |

| Annotation Cluster: RNA PROCESSING |                                                 | Count | p Value | Genes                                                                                                                                                                                                                                           | Fold Enrichment |
|------------------------------------|-------------------------------------------------|-------|---------|-------------------------------------------------------------------------------------------------------------------------------------------------------------------------------------------------------------------------------------------------|-----------------|
| GOTERM_BP_FAT                      | GO:0042254~ribosome biogenesis                  | 12    | 0.004   | DIS3, DCAF13, RNASEL, RPS19, DKC1, TSR2, UTP6, NOP58, GNL3L, HEATR1, RSL24D1, NOP10, FARS2, LIN28B, INTS6, TRNT1, UTP3, HMG1B1, ZBTB33, PDUI3, TAF7L, TSPYL1, CIR1, MYH1, SOX11, ZFX, NXF5, FOXP1, WASL, SH3D19, PPARGC1A, TARBP1, PPIH, LARP7, | 2.75            |
| GOTERM_BP_FAT                      | GO:0006364~RNA processing                       | 10    | 0.006   |                                                                                                                                                                                                                                                 | 3.04            |
| SP_PIR_KEYWORDS                    | ribosome biogenesis                             | 7     | 0.006   |                                                                                                                                                                                                                                                 | 4.17            |
| GOTERM_BP_FAT                      | GO:0016072~rRNA metabolic process               | 10    | 0.007   |                                                                                                                                                                                                                                                 | 2.91            |
| GOTERM_BP_FAT                      | GO:0034470~ncRNA processing                     | 14    | 0.017   |                                                                                                                                                                                                                                                 | 2.09            |
| SP_PIR_KEYWORDS                    | rna processing                                  | 7     | 0.019   |                                                                                                                                                                                                                                                 | 3.28            |
| GOTERM_BP_FAT                      | GO:0022613~ribonucleoprotein complex biogenesis | 12    | 0.058   |                                                                                                                                                                                                                                                 | 1.86            |
| GOTERM_BP_FAT                      | GO:0034660~ncRNA metabolic process              | 14    | 0.069   |                                                                                                                                                                                                                                                 | 1.70            |
| GOTERM_CC_FAT                      | GO:0005730~nucleolus                            | 25    | 0.627   |                                                                                                                                                                                                                                                 | 0.99            |
| GOTERM_BP_FAT                      | GO:0006396~RNA processing                       | 19    | 0.674   |                                                                                                                                                                                                                                                 | 0.97            |

| Annotation Cluster: EGF PATHWAY |                                           | Count | p Value | Genes                                                                                                                                      | Fold Enrichment |
|---------------------------------|-------------------------------------------|-------|---------|--------------------------------------------------------------------------------------------------------------------------------------------|-----------------|
| INTERPRO                        | IPR013032:EGF-like region, conserved site | 20    | 0.007   | EPHA3, TNFRSF11A, GPR113, HVAL2, EPGN, ADAM15, ADAM2, ITGB1, PTGS2, TGFA, AREG, MMRN1, CNTNAP4, LTBP3, NRXN3, TEK, UMOD, WIF1, EGF, SCARF2 | 1.96            |
| SMART                           | SM00181:EGF                               | 15    | 0.008   |                                                                                                                                            | 2.19            |
| INTERPRO                        | IPR006210:EGF-like                        | 15    | 0.011   |                                                                                                                                            | 2.14            |
| UP_SEQ_FEATURE                  | domain:EGF-like                           | 8     | 0.017   |                                                                                                                                            | 2.99            |

|                 |                              |    |       |      |
|-----------------|------------------------------|----|-------|------|
| INTERPRO        | IPR000742:EGF-like, type 3   | 14 | 0.018 | 2.07 |
| SP_PIR_KEYWORDS | egf-like domain              | 15 | 0.031 | 1.87 |
| INTERPRO        | IPR013111:EGF, extracellular | 6  | 0.068 | 2.73 |
| INTERPRO        | IPR006209:EGF                | 9  | 0.076 | 2.03 |
| UP_SEQ_FEATURE  | domain:EGF-like 3            | 6  | 0.123 | 2.28 |
| UP_SEQ_FEATURE  | domain:EGF-like 1            | 8  | 0.130 | 1.90 |
| UP_SEQ_FEATURE  | domain:EGF-like 2            | 5  | 0.373 | 1.62 |
| UP_SEQ_FEATURE  | domain:EGF-like 5            | 3  | 0.425 | 2.08 |
| UP_SEQ_FEATURE  | domain:EGF-like 4            | 3  | 0.609 | 1.47 |

| Annotation Cluster: CHROMATIN ORGANIZATION |                                                                                     | Count | p Value | Genes                                                                                                                                                                                                                                                                                                                                                                                                                                                                               | Fold Enrichment |
|--------------------------------------------|-------------------------------------------------------------------------------------|-------|---------|-------------------------------------------------------------------------------------------------------------------------------------------------------------------------------------------------------------------------------------------------------------------------------------------------------------------------------------------------------------------------------------------------------------------------------------------------------------------------------------|-----------------|
| INTERPRO                                   | IPR009072:Histone-fold                                                              | 8     | 0.003   | SUP3H, HIST1H2BC, HIST4H4, HIST1H4A, HIST1H2BL, TAF9B, HIST1H3A, HIST1H2AI, H2AF1, HIST1H4J, HIST1H3H, HIST1H1C, HIST1H1A, CENPF, X, TSPYL1, ARID4A, BAZ1B, CHD1, UTP3, ENY2, HMG1B, KDM5B, AEBP2, HDAC10, BANP, HMG20B, RPS6KA5, SUZ12, MSL1, DKC1, RFC1, PELO, MBD2, FANCI, HIST1H3A, CD40LG, C5, KDM1B, MYH1, G3BP1, MYH4, RAP1B, RUNX1, RAB21, SUN2, TEX12, TALL1, DMCI1, FGG, PSMG2, TUBAL3, WASL, SLC38A2, EPAS1, RXRA, UBE2CBP, RNF43, TALL1, SORBS2, TRIM31, FBXO43, SCN9A, | 4.25            |
| GOTERM_BP_FAT                              | GO:0065004~protein-DNA complex assembly                                             | 10    | 0.005   |                                                                                                                                                                                                                                                                                                                                                                                                                                                                                     | 3.07            |
| GOTERM_BP_FAT                              | GO:0006333~chromatin assembly or disassembly                                        | 12    | 0.006   |                                                                                                                                                                                                                                                                                                                                                                                                                                                                                     | 2.64            |
| GOTERM_CC_FAT                              | GO:0000786~nucleosome                                                               | 8     | 0.007   |                                                                                                                                                                                                                                                                                                                                                                                                                                                                                     | 3.51            |
| GOTERM_BP_FAT                              | GO:0006325~chromatin organization                                                   | 24    | 0.009   |                                                                                                                                                                                                                                                                                                                                                                                                                                                                                     | 1.77            |
| GOTERM_BP_FAT                              | GO:0006334~nucleosome assembly                                                      | 9     | 0.010   |                                                                                                                                                                                                                                                                                                                                                                                                                                                                                     | 2.99            |
| GOTERM_BP_FAT                              | GO:0031497~chromatin assembly                                                       | 9     | 0.012   |                                                                                                                                                                                                                                                                                                                                                                                                                                                                                     | 2.89            |
| GOTERM_BP_FAT                              | GO:0051276~chromosome organization                                                  | 28    | 0.015   |                                                                                                                                                                                                                                                                                                                                                                                                                                                                                     | 1.61            |
| GOTERM_BP_FAT                              | GO:0034728~nucleosome organization                                                  | 9     | 0.018   |                                                                                                                                                                                                                                                                                                                                                                                                                                                                                     | 2.70            |
| INTERPRO                                   | IPR007125:Histone core                                                              | 6     | 0.020   |                                                                                                                                                                                                                                                                                                                                                                                                                                                                                     | 3.82            |
| SP_PIR_KEYWORDS                            | nucleosome core                                                                     | 6     | 0.025   |                                                                                                                                                                                                                                                                                                                                                                                                                                                                                     | 3.58            |
| GOTERM_CC_FAT                              | GO:0000785~chromatin                                                                | 14    | 0.029   |                                                                                                                                                                                                                                                                                                                                                                                                                                                                                     | 1.94            |
| SP_PIR_KEYWORDS                            | chromosomal protein                                                                 | 11    | 0.031   |                                                                                                                                                                                                                                                                                                                                                                                                                                                                                     | 2.17            |
| GOTERM_CC_FAT                              | GO:0032993~protein-DNA complex                                                      | 8     | 0.035   |                                                                                                                                                                                                                                                                                                                                                                                                                                                                                     | 2.57            |
| GOTERM_BP_FAT                              | GO:0006323~DNA packaging                                                            | 9     | 0.058   |                                                                                                                                                                                                                                                                                                                                                                                                                                                                                     | 2.15            |
| KEGG_PATHWAY                               | hsa05322:Systemic lupus erythematosus                                               | 8     | 0.073   |                                                                                                                                                                                                                                                                                                                                                                                                                                                                                     | 2.17            |
| PIR_SUPERFAMILY                            | PIRSF002048:histone H2A                                                             | 3     | 0.113   |                                                                                                                                                                                                                                                                                                                                                                                                                                                                                     | 5.14            |
| SMART                                      | SM00414:H2A                                                                         | 3     | 0.134   |                                                                                                                                                                                                                                                                                                                                                                                                                                                                                     | 4.64            |
| INTERPRO                                   | IPR002119:Histone H2A                                                               | 3     | 0.140   |                                                                                                                                                                                                                                                                                                                                                                                                                                                                                     | 4.53            |
| SP_PIR_KEYWORDS                            | citullination                                                                       | 3     | 0.178   |                                                                                                                                                                                                                                                                                                                                                                                                                                                                                     | 3.90            |
| SP_PIR_KEYWORDS                            | chromatin regulator                                                                 | 11    | 0.211   |                                                                                                                                                                                                                                                                                                                                                                                                                                                                                     | 1.48            |
| SP_PIR_KEYWORDS                            | methylation                                                                         | 12    | 0.225   |                                                                                                                                                                                                                                                                                                                                                                                                                                                                                     | 1.42            |
| GOTERM_CC_FAT                              | GO:0005694~chromosome                                                               | 21    | 0.227   |                                                                                                                                                                                                                                                                                                                                                                                                                                                                                     | 1.26            |
| GOTERM_CC_FAT                              | GO:0044427~chromosomal part                                                         | 18    | 0.233   |                                                                                                                                                                                                                                                                                                                                                                                                                                                                                     | 1.29            |
| GOTERM_BP_FAT                              | GO:0016568~chromatin modification                                                   | 13    | 0.277   |                                                                                                                                                                                                                                                                                                                                                                                                                                                                                     | 1.33            |
| GOTERM_BP_FAT                              | GO:0034622~cellular macromolecular complex assembly                                 | 14    | 0.349   |                                                                                                                                                                                                                                                                                                                                                                                                                                                                                     | 1.23            |
| UP_SEQ_FEATURE                             | cross-link:Glycyl lysine isopeptide (Lys-Gly) (interchain with G-Cter in ubiquitin) | 9     | 0.399   |                                                                                                                                                                                                                                                                                                                                                                                                                                                                                     | 1.29            |
| GOTERM_BP_FAT                              | GO:0034621~cellular macromolecular complex subunit organization                     | 15    | 0.401   |                                                                                                                                                                                                                                                                                                                                                                                                                                                                                     | 1.17            |
| SP_PIR_KEYWORDS                            | isopeptide bond                                                                     | 12    | 0.559   |                                                                                                                                                                                                                                                                                                                                                                                                                                                                                     | 1.08            |
| SP_PIR_KEYWORDS                            | ubiquitination                                                                      | 20    | 0.667   |                                                                                                                                                                                                                                                                                                                                                                                                                                                                                     | 0.97            |

| Annotation Cluster: RESPONSE TO EXTERNAL STIMULUS |                                                                 | Count | p Value | Genes                                                                                                            | Fold Enrichment |
|---------------------------------------------------|-----------------------------------------------------------------|-------|---------|------------------------------------------------------------------------------------------------------------------|-----------------|
| GOTERM_BP_FAT                                     | GO:0032103~positive regulation of response to external stimulus | 7     | 0.026   | FCER1A, ZFP91, ADAM10, CNTF, IL8, F3, FABP4, TAC1, SH2D1A, CARD9, TLR3, PTGS2, ACVR2B, PTGS2, SI, ILDR2, EIF2B2, | 3.06            |
| GOTERM_BP_FAT                                     | GO:0031349~positive regulation of defense response              | 6     | 0.119   |                                                                                                                  | 2.30            |
| GOTERM_BP_FAT                                     | GO:0050729~positive regulation of inflammatory response         | 3     | 0.291   |                                                                                                                  | 2.80            |
| GOTERM_BP_FAT                                     | GO:0050727~regulation of inflammatory response                  | 4     | 0.513   |                                                                                                                  | 1.47            |
| GOTERM_BP_FAT                                     | GO:0034284~response to monosaccharide stimulus                  | 5     | 0.086   |                                                                                                                  | 2.97            |
| GOTERM_BP_FAT                                     | GO:0009746~response to hexose stimulus                          | 5     | 0.086   |                                                                                                                  | 2.97            |
| GOTERM_BP_FAT                                     | GO:0009743~response to carbohydrate stimulus                    | 5     | 0.166   |                                                                                                                  | 2.33            |

|               |                                        |   |       |      |
|---------------|----------------------------------------|---|-------|------|
| GOTERM_BP_FAT | GO:009749~response to glucose stimulus | 3 | 0.481 | 1.86 |
|---------------|----------------------------------------|---|-------|------|

**Annotation Cluster: PROLIFERATION**

| Category        | Term                                                                                 | Count | p Value | Genes                                                                                                                                                                                                                                                                                                                                                                                                                                                                                                                                                                                                                                                                                                                                                                                                                                                                                                                                                                                                          | Fold Enrichment |
|-----------------|--------------------------------------------------------------------------------------|-------|---------|----------------------------------------------------------------------------------------------------------------------------------------------------------------------------------------------------------------------------------------------------------------------------------------------------------------------------------------------------------------------------------------------------------------------------------------------------------------------------------------------------------------------------------------------------------------------------------------------------------------------------------------------------------------------------------------------------------------------------------------------------------------------------------------------------------------------------------------------------------------------------------------------------------------------------------------------------------------------------------------------------------------|-----------------|
| GOTERM_BP_FAT   | GO:0045741~positive regulation of epidermal growth factor receptor activity          | 3     | 0.012   | EPGN, TGFA, EGF, FCER1A, CARD9, IL5, PTGS2, TLR3, TAC1, EDA2R, SHOC2, RICTOR, MBD2, TRAT1, ZFP91, ACVR2B, CNTF, CDKN2B, F3, MTOR, NMU, AMOT, PPARGC1A, PSMG2, CENPF, ANAPC10, CEP76, DAZL, PTPLAD1, C5, ITGA1, GPI, IL8, EPAS1, PDGFA, IL18, NAA15, CCDC88C, NF1, DGKH, IL22, CCNE2, FABP4, PRKACB, SOCS2, DRD2, PRDX4, TANK, RPS6KA5, PKD2, PKD1, LRRK2, ITGB1, ADCYAP1, KRTP21-1, CCNA2, ARHGAP27, BUD31, GNAQ, HTR7, PSMG2, CDKN2B, CENPF, CCNA2, CCNE2, FAMS8A, EPGN, TGFA, ANAPC10, EGF, ZFP91, ADAM10, CNTF, TAF9B, AMOT, RNF6, NOP58, MTOR, DCLK1, SEPTAD2, DRD2, RICTOR, RBP4, SOCS2, MSTN, NPY1R, IGF1, HTRA1, PSMG2, CDKN2B, EPGN, CENPF, TGFA, ANAPC10, EGF, CCNA2, HAUS3, MPHOSPH9, HAUS6, CDKN2B, NEK1, SUN2, CENPF, NEK9, HORMAD1, ITGB1, CCNE2, BBS4, HAUS3, RBP4, PAR6B, HAUS6, NEK1, CENPF, NEK9, PELO, ANAPC10, CCNA2, MPHOSPH9, HORMAD1, MPHOSPH9, SUN2, FBXO43, HORMAD1, DMCI, HMG20B, BANP, VASH1, CDKN2B, FANCI, ITGB1, CDKN2B, IL8, VASH1, PKD2, PKD1, FANCI, IL8, HMG20B, BANP, VASH1, | 16.77           |
| INTERPRO        | IPR001336:EGF_type_1                                                                 | 3     | 0.017   |                                                                                                                                                                                                                                                                                                                                                                                                                                                                                                                                                                                                                                                                                                                                                                                                                                                                                                                                                                                                                | 14.34           |
| GOTERM_BP_FAT   | GO:0010647~positive regulation of cell communication                                 | 20    | 0.027   |                                                                                                                                                                                                                                                                                                                                                                                                                                                                                                                                                                                                                                                                                                                                                                                                                                                                                                                                                                                                                | 1.70            |
| GOTERM_BP_FAT   | GO:0010638~positive regulation of organelle organization                             | 8     | 0.029   |                                                                                                                                                                                                                                                                                                                                                                                                                                                                                                                                                                                                                                                                                                                                                                                                                                                                                                                                                                                                                | 2.69            |
| GOTERM_BP_FAT   | GO:0051783~regulation of nuclear division                                            | 6     | 0.049   |                                                                                                                                                                                                                                                                                                                                                                                                                                                                                                                                                                                                                                                                                                                                                                                                                                                                                                                                                                                                                | 2.99            |
| GOTERM_BP_FAT   | GO:0007088~regulation of mitosis                                                     | 6     | 0.049   |                                                                                                                                                                                                                                                                                                                                                                                                                                                                                                                                                                                                                                                                                                                                                                                                                                                                                                                                                                                                                | 2.99            |
| GOTERM_BP_FAT   | GO:0045742~positive regulation of epidermal growth factor receptor signaling pathway | 3     | 0.057   |                                                                                                                                                                                                                                                                                                                                                                                                                                                                                                                                                                                                                                                                                                                                                                                                                                                                                                                                                                                                                | 7.62            |
| GOTERM_BP_FAT   | GO:0009967~positive regulation of signal transduction                                | 17    | 0.064   |                                                                                                                                                                                                                                                                                                                                                                                                                                                                                                                                                                                                                                                                                                                                                                                                                                                                                                                                                                                                                | 1.61            |
| GOTERM_MF_FAT   | GO:0005154~epidermal growth factor receptor binding                                  | 3     | 0.089   |                                                                                                                                                                                                                                                                                                                                                                                                                                                                                                                                                                                                                                                                                                                                                                                                                                                                                                                                                                                                                | 5.92            |
| GOTERM_BP_FAT   | GO:0007176~regulation of epidermal growth factor receptor activity                   | 3     | 0.098   |                                                                                                                                                                                                                                                                                                                                                                                                                                                                                                                                                                                                                                                                                                                                                                                                                                                                                                                                                                                                                | 5.59            |
| GOTERM_BP_FAT   | GO:0010564~regulation of cell cycle process                                          | 8     | 0.113   |                                                                                                                                                                                                                                                                                                                                                                                                                                                                                                                                                                                                                                                                                                                                                                                                                                                                                                                                                                                                                | 1.96            |
| GOTERM_BP_FAT   | GO:0010469~regulation of receptor activity                                           | 3     | 0.134   |                                                                                                                                                                                                                                                                                                                                                                                                                                                                                                                                                                                                                                                                                                                                                                                                                                                                                                                                                                                                                | 4.66            |
| GOTERM_BP_FAT   | GO:0043406~positive regulation of MAP kinase activity                                | 7     | 0.157   |                                                                                                                                                                                                                                                                                                                                                                                                                                                                                                                                                                                                                                                                                                                                                                                                                                                                                                                                                                                                                | 1.92            |
| GOTERM_BP_FAT   | GO:0001525~angiogenesis                                                              | 9     | 0.160   |                                                                                                                                                                                                                                                                                                                                                                                                                                                                                                                                                                                                                                                                                                                                                                                                                                                                                                                                                                                                                | 1.70            |
| GOTERM_BP_FAT   | GO:0042325~regulation of phosphorylation                                             | 22    | 0.162   |                                                                                                                                                                                                                                                                                                                                                                                                                                                                                                                                                                                                                                                                                                                                                                                                                                                                                                                                                                                                                | 1.32            |
| GOTERM_BP_FAT   | GO:0000187~activation of MAPK activity                                               | 6     | 0.169   |                                                                                                                                                                                                                                                                                                                                                                                                                                                                                                                                                                                                                                                                                                                                                                                                                                                                                                                                                                                                                | 2.05            |
| GOTERM_BP_FAT   | GO:0007243~protein kinase cascade                                                    | 18    | 0.173   |                                                                                                                                                                                                                                                                                                                                                                                                                                                                                                                                                                                                                                                                                                                                                                                                                                                                                                                                                                                                                | 1.36            |
| GOTERM_BP_FAT   | GO:0010627~regulation of protein kinase cascade                                      | 13    | 0.183   |                                                                                                                                                                                                                                                                                                                                                                                                                                                                                                                                                                                                                                                                                                                                                                                                                                                                                                                                                                                                                | 1.46            |
| GOTERM_BP_FAT   | GO:0030071~regulation of mitotic metaphase/anaphase transition                       | 3     | 0.184   |                                                                                                                                                                                                                                                                                                                                                                                                                                                                                                                                                                                                                                                                                                                                                                                                                                                                                                                                                                                                                | 3.81            |
| GOTERM_BP_FAT   | GO:0042058~regulation of epidermal growth factor receptor signaling pathway          | 3     | 0.198   |                                                                                                                                                                                                                                                                                                                                                                                                                                                                                                                                                                                                                                                                                                                                                                                                                                                                                                                                                                                                                | 3.65            |
| GOTERM_BP_FAT   | GO:0051174~regulation of phosphorus metabolic process                                | 22    | 0.212   |                                                                                                                                                                                                                                                                                                                                                                                                                                                                                                                                                                                                                                                                                                                                                                                                                                                                                                                                                                                                                | 1.27            |
| GOTERM_BP_FAT   | GO:0019220~regulation of phosphate metabolic process                                 | 22    | 0.212   |                                                                                                                                                                                                                                                                                                                                                                                                                                                                                                                                                                                                                                                                                                                                                                                                                                                                                                                                                                                                                | 1.27            |
| GOTERM_BP_FAT   | GO:0051785~positive regulation of nuclear division                                   | 3     | 0.224   |                                                                                                                                                                                                                                                                                                                                                                                                                                                                                                                                                                                                                                                                                                                                                                                                                                                                                                                                                                                                                | 3.35            |
| GOTERM_BP_FAT   | GO:0045840~positive regulation of mitosis                                            | 3     | 0.224   |                                                                                                                                                                                                                                                                                                                                                                                                                                                                                                                                                                                                                                                                                                                                                                                                                                                                                                                                                                                                                | 3.35            |
| GOTERM_BP_FAT   | GO:0043405~regulation of MAP kinase activity                                         | 8     | 0.239   |                                                                                                                                                                                                                                                                                                                                                                                                                                                                                                                                                                                                                                                                                                                                                                                                                                                                                                                                                                                                                | 1.59            |
| GOTERM_BP_FAT   | GO:0045859~regulation of protein kinase activity                                     | 16    | 0.253   |                                                                                                                                                                                                                                                                                                                                                                                                                                                                                                                                                                                                                                                                                                                                                                                                                                                                                                                                                                                                                | 1.30            |
| GOTERM_BP_FAT   | GO:0045860~positive regulation of protein kinase activity                            | 11    | 0.276   |                                                                                                                                                                                                                                                                                                                                                                                                                                                                                                                                                                                                                                                                                                                                                                                                                                                                                                                                                                                                                | 1.38            |
| GOTERM_BP_FAT   | GO:0051726~regulation of cell cycle                                                  | 15    | 0.296   |                                                                                                                                                                                                                                                                                                                                                                                                                                                                                                                                                                                                                                                                                                                                                                                                                                                                                                                                                                                                                | 1.27            |
| GOTERM_BP_FAT   | GO:0043549~regulation of kinase activity                                             | 16    | 0.297   |                                                                                                                                                                                                                                                                                                                                                                                                                                                                                                                                                                                                                                                                                                                                                                                                                                                                                                                                                                                                                | 1.25            |
| GOTERM_BP_FAT   | GO:0007346~regulation of mitotic cell cycle                                          | 8     | 0.300   |                                                                                                                                                                                                                                                                                                                                                                                                                                                                                                                                                                                                                                                                                                                                                                                                                                                                                                                                                                                                                | 1.47            |
| GOTERM_BP_FAT   | GO:0033674~positive regulation of kinase activity                                    | 11    | 0.312   |                                                                                                                                                                                                                                                                                                                                                                                                                                                                                                                                                                                                                                                                                                                                                                                                                                                                                                                                                                                                                | 1.33            |
| GOTERM_BP_FAT   | GO:0000165~MAPKKK cascade                                                            | 9     | 0.336   |                                                                                                                                                                                                                                                                                                                                                                                                                                                                                                                                                                                                                                                                                                                                                                                                                                                                                                                                                                                                                | 1.37            |
| GOTERM_BP_FAT   | GO:0051338~regulation of transferase activity                                        | 16    | 0.352   |                                                                                                                                                                                                                                                                                                                                                                                                                                                                                                                                                                                                                                                                                                                                                                                                                                                                                                                                                                                                                | 1.20            |
| GOTERM_BP_FAT   | GO:0051347~positive regulation of transferase activity                               | 11    | 0.355   |                                                                                                                                                                                                                                                                                                                                                                                                                                                                                                                                                                                                                                                                                                                                                                                                                                                                                                                                                                                                                | 1.28            |
| GOTERM_BP_FAT   | GO:0043085~positive regulation of catalytic activity                                 | 20    | 0.500   |                                                                                                                                                                                                                                                                                                                                                                                                                                                                                                                                                                                                                                                                                                                                                                                                                                                                                                                                                                                                                | 1.08            |
| GOTERM_BP_FAT   | GO:0044093~positive regulation of molecular function                                 | 22    | 0.523   |                                                                                                                                                                                                                                                                                                                                                                                                                                                                                                                                                                                                                                                                                                                                                                                                                                                                                                                                                                                                                | 1.05            |
| GOTERM_BP_FAT   | GO:0032147~activation of protein kinase activity                                     | 5     | 0.585   |                                                                                                                                                                                                                                                                                                                                                                                                                                                                                                                                                                                                                                                                                                                                                                                                                                                                                                                                                                                                                | 1.23            |
| GOTERM_BP_FAT   | GO:0045787~positive regulation of cell cycle                                         | 3     | 0.609   |                                                                                                                                                                                                                                                                                                                                                                                                                                                                                                                                                                                                                                                                                                                                                                                                                                                                                                                                                                                                                | 1.47            |
| GOTERM_BP_FAT   | GO:0007093~mitotic cell cycle checkpoint                                             | 4     | 0.198   |                                                                                                                                                                                                                                                                                                                                                                                                                                                                                                                                                                                                                                                                                                                                                                                                                                                                                                                                                                                                                | 2.60            |
| SP_PIR_KEYWORDS | cyclin                                                                               | 4     | 0.253   |                                                                                                                                                                                                                                                                                                                                                                                                                                                                                                                                                                                                                                                                                                                                                                                                                                                                                                                                                                                                                | 2.29            |
| GOTERM_BP_FAT   | GO:0007346~regulation of mitotic cell cycle                                          | 8     | 0.300   |                                                                                                                                                                                                                                                                                                                                                                                                                                                                                                                                                                                                                                                                                                                                                                                                                                                                                                                                                                                                                | 1.47            |
| GOTERM_BP_FAT   | GO:0000075~cell cycle checkpoint                                                     | 5     | 0.410   |                                                                                                                                                                                                                                                                                                                                                                                                                                                                                                                                                                                                                                                                                                                                                                                                                                                                                                                                                                                                                | 1.54            |
| KEGG_PATHWAY    | hsa04110:Cell cycle                                                                  | 4     | 0.848   |                                                                                                                                                                                                                                                                                                                                                                                                                                                                                                                                                                                                                                                                                                                                                                                                                                                                                                                                                                                                                | 0.86            |
| GOTERM_BP_FAT   | GO:0045793~positive regulation of cell size                                          | 4     | 0.245   |                                                                                                                                                                                                                                                                                                                                                                                                                                                                                                                                                                                                                                                                                                                                                                                                                                                                                                                                                                                                                | 2.33            |
| GOTERM_BP_FAT   | GO:0030307~positive regulation of cell growth                                        | 3     | 0.445   |                                                                                                                                                                                                                                                                                                                                                                                                                                                                                                                                                                                                                                                                                                                                                                                                                                                                                                                                                                                                                | 2.00            |
| GOTERM_BP_FAT   | GO:0008361~regulation of cell size                                                   | 9     | 0.455   |                                                                                                                                                                                                                                                                                                                                                                                                                                                                                                                                                                                                                                                                                                                                                                                                                                                                                                                                                                                                                | 1.22            |
| GOTERM_BP_FAT   | GO:0045927~positive regulation of growth                                             | 4     | 0.548   |                                                                                                                                                                                                                                                                                                                                                                                                                                                                                                                                                                                                                                                                                                                                                                                                                                                                                                                                                                                                                | 1.40            |

|                 |                                                  |    |       |      |
|-----------------|--------------------------------------------------|----|-------|------|
| GOTERM_BP_FAT   | GO:0032535~regulation of cellular component size | 10 | 0.635 | 1.03 |
| GOTERM_BP_FAT   | GO:0040008~regulation of growth                  | 12 | 0.678 | 0.98 |
| GOTERM_BP_FAT   | GO:0001558~regulation of cell growth             | 7  | 0.696 | 1.01 |
| GOTERM_BP_FAT   | GO:0007346~regulation of mitotic cell cycle      | 8  | 0.300 | 1.47 |
| GOTERM_BP_FAT   | GO:0051329~interphase of mitotic cell cycle      | 4  | 0.717 | 1.09 |
| GOTERM_BP_FAT   | GO:0051325~interphase                            | 4  | 0.735 | 1.05 |
| GOTERM_BP_FAT   | GO:0000278~mitotic cell cycle                    | 12 | 0.774 | 0.91 |
| GOTERM_BP_FAT   | GO:0051301~cell division                         | 12 | 0.486 | 1.14 |
| GOTERM_BP_FAT   | GO:0000087~M phase of mitotic cell cycle         | 9  | 0.550 | 1.12 |
| SP_PIR_KEYWORDS | cell division                                    | 10 | 0.575 | 1.08 |
| SP_PIR_KEYWORDS | mitosis                                          | 7  | 0.619 | 1.09 |
| GOTERM_BP_FAT   | GO:0000279~M phase                               | 12 | 0.631 | 1.02 |
| SP_PIR_KEYWORDS | cell cycle                                       | 16 | 0.646 | 0.99 |
| GOTERM_BP_FAT   | GO:0007067~mitosis                               | 8  | 0.675 | 1.02 |
| GOTERM_BP_FAT   | GO:0000280~nuclear division                      | 8  | 0.675 | 1.02 |
| GOTERM_BP_FAT   | GO:0048285~organelle fission                     | 8  | 0.714 | 0.98 |
| GOTERM_BP_FAT   | GO:0022403~cell cycle phase                      | 14 | 0.722 | 0.95 |
| GOTERM_BP_FAT   | GO:0022402~cell cycle process                    | 19 | 0.725 | 0.94 |
| GOTERM_BP_FAT   | GO:0000278~mitotic cell cycle                    | 12 | 0.774 | 0.91 |
| GOTERM_BP_FAT   | GO:0007049~cell cycle                            | 25 | 0.797 | 0.90 |
| GOTERM_CC_FAT   | GO:0005819~spindle                               | 3  | 0.971 | 0.56 |

**Annotation Cluster: JAK-STAT SIGNALING PATHWAY**

| Category      | Term                                                       | Count | p Value | Genes                                                                                | Fold Enrichment |
|---------------|------------------------------------------------------------|-------|---------|--------------------------------------------------------------------------------------|-----------------|
| GOTERM_BP_FAT | GO:0050730~regulation of peptidyl-tyrosine phosphorylation | 8     | 0.010   | FCER1A, ZFP91, ILS, CNTF, PDGFA, MTOR, RICTOR, EGF, IL22, ZFP91, CNTF, SPRY3, SOCS2, | 3.29            |
| GOTERM_BP_FAT | GO:0046425~regulation of JAK-STAT cascade                  | 3     | 0.370   |                                                                                      | 2.33            |
| INTERPRO      | IPR012351.Four-helical cytokine, core                      | 3     | 0.479   |                                                                                      | 1.87            |
| KEGG_PATHWAY  | hsa04630Jak-STAT signaling pathway                         | 5     | 0.833   |                                                                                      | 0.87            |

**Annotation Cluster: POSITIVE REGULATION OF ADENYLATE CYCLASE ACTIVITY**

| Category      | Term                                                                          | Count | p Value | Genes                                                                                                                                                                                                                                                   | Fold Enrichment |
|---------------|-------------------------------------------------------------------------------|-------|---------|---------------------------------------------------------------------------------------------------------------------------------------------------------------------------------------------------------------------------------------------------------|-----------------|
| GOTERM_BP_FAT | GO:0030814~regulation of cAMP metabolic process                               | 8     | 0.075   | GNAQ, DRD2, HTR7, GRM7, NF1, PKD2, NPY1R, ADCYAP1, RXFP1, PRKACB, PTGS2, EGF, TRAT1, MTNR1A, PDGFA, TUBAL3, HIST4H4, IL8, PIK3C2A, BUD31, HIST1H4A, HIST1H4J, NMMU, CYSLTR1, PTH2R, TSHB, GRIN3A, ATP2B1, CYSLTR1, PLN, FABP4, ANAPC10, FABP4, ANAPC10, | 2.17            |
| GOTERM_BP_FAT | GO:0030799~regulation of cyclic nucleotide metabolic process                  | 8     | 0.110   |                                                                                                                                                                                                                                                         | 1.98            |
| GOTERM_BP_FAT | GO:0006140~regulation of nucleotide metabolic process                         | 8     | 0.121   |                                                                                                                                                                                                                                                         | 1.93            |
| GOTERM_BP_FAT | GO:0045761~regulation of adenylate cyclase activity                           | 7     | 0.129   |                                                                                                                                                                                                                                                         | 2.04            |
| GOTERM_BP_FAT | GO:0031279~regulation of cyclase activity                                     | 7     | 0.143   |                                                                                                                                                                                                                                                         | 1.98            |
| GOTERM_BP_FAT | GO:0030817~regulation of cAMP biosynthetic process                            | 7     | 0.152   |                                                                                                                                                                                                                                                         | 1.94            |
| GOTERM_BP_FAT | GO:0051339~regulation of lyase activity                                       | 7     | 0.152   |                                                                                                                                                                                                                                                         | 1.94            |
| GOTERM_BP_FAT | GO:0007188~G-protein signaling, coupled to cAMP nucleotide second messenger   | 6     | 0.187   |                                                                                                                                                                                                                                                         | 1.97            |
| GOTERM_BP_FAT | GO:0030808~regulation of nucleotide biosynthetic process                      | 7     | 0.200   |                                                                                                                                                                                                                                                         | 1.78            |
| GOTERM_BP_FAT | GO:0030802~regulation of cyclic nucleotide biosynthetic process               | 7     | 0.200   |                                                                                                                                                                                                                                                         | 1.78            |
| GOTERM_BP_FAT | GO:0051051~negative regulation of transport                                   | 8     | 0.208   |                                                                                                                                                                                                                                                         | 1.66            |
| GOTERM_BP_FAT | GO:0007187~G-protein signaling, coupled to cyclic nucleotide second messenger | 7     | 0.228   |                                                                                                                                                                                                                                                         | 1.70            |
| KEGG_PATHWAY  | hsa04540.Gap junction                                                         | 6     | 0.232   |                                                                                                                                                                                                                                                         | 1.81            |
| GOTERM_BP_FAT | GO:0019933~cAMP-mediated signaling                                            | 6     | 0.252   |                                                                                                                                                                                                                                                         | 1.77            |
| GOTERM_BP_FAT | GO:0051048~negative regulation of secretion                                   | 4     | 0.313   |                                                                                                                                                                                                                                                         | 2.03            |
| GOTERM_BP_FAT | GO:0019935~cyclic-nucleotide-mediated signaling                               | 7     | 0.320   |                                                                                                                                                                                                                                                         | 1.51            |
| GOTERM_BP_FAT | GO:0045762~positive regulation of adenylate cyclase activity                  | 4     | 0.323   |                                                                                                                                                                                                                                                         | 2.00            |
| GOTERM_BP_FAT | GO:0019932~second-messenger-mediated signaling                                | 11    | 0.331   |                                                                                                                                                                                                                                                         | 1.31            |
| GOTERM_BP_FAT | GO:0031281~positive regulation of cyclase activity                            | 4     | 0.333   |                                                                                                                                                                                                                                                         | 1.96            |
| GOTERM_BP_FAT | GO:0051349~positive regulation of lyase activity                              | 4     | 0.353   |                                                                                                                                                                                                                                                         | 1.89            |

|               |                                                              |    |       |      |
|---------------|--------------------------------------------------------------|----|-------|------|
| GOTERM_BP_FAT | GO:0007631~feeding behavior                                  | 4  | 0.449 | 1.62 |
| GOTERM_BP_FAT | GO:0007623~circadian rhythm                                  | 3  | 0.493 | 1.82 |
| GOTERM_BP_FAT | GO:0031280~negative regulation of cyclase activity           | 3  | 0.589 | 1.52 |
| GOTERM_BP_FAT | GO:0051350~negative regulation of lyase activity             | 3  | 0.589 | 1.52 |
| GOTERM_BP_FAT | GO:0007194~negative regulation of adenylate cyclase activity | 3  | 0.589 | 1.52 |
| GOTERM_BP_FAT | GO:0007190~activation of adenylate cyclase activity          | 3  | 0.589 | 1.52 |
| KEGG_PATHWAY  | hsa04080:Neuroactive ligand-receptor interaction             | 10 | 0.612 | 1.05 |
| KEGG_PATHWAY  | hsa04020:Calcium signaling pathway                           | 6  | 0.787 | 0.92 |
| GOTERM_BP_FAT | GO:0043086~negative regulation of catalytic activity         | 6  | 0.972 | 0.61 |
| GOTERM_BP_FAT | GO:0044092~negative regulation of molecular function         | 7  | 0.981 | 0.59 |

**Annotation Cluster: CYCLINS**

| Category        | Term                         | Count | p Value | Genes                        | Fold Enrichment |
|-----------------|------------------------------|-------|---------|------------------------------|-----------------|
| SP_PIR_KEYWORDS | cyclin                       | 4     | 0.253   | CCNE2, CDKN2B, FAM58A, CCNA2 | 2.29            |
| INTERPRO        | IPR006671:Cyclin, N-terminal | 3     | 0.320   |                              | 2.61            |
| INTERPRO        | IPR013763:Cyclin-related     | 3     | 0.371   |                              | 2.32            |
| SMART           | SM00385:CYCLIN               | 3     | 0.396   |                              | 2.20            |
| INTERPRO        | IPR006670:Cyclin             | 3     | 0.408   |                              | 2.15            |

**Annotation Cluster: FATTY ACID METABOLIC PROCESS**

| Category      | Term                                                       | Count | p Value | Genes                                       | Fold Enrichment |
|---------------|------------------------------------------------------------|-------|---------|---------------------------------------------|-----------------|
| GOTERM_BP_FAT | GO:0046320~regulation of fatty acid oxidation              | 3     | 0.264   | CAB39L, MTOR, PPARGC1A, BBS4, PDGFA, ACER1, | 2.99            |
| GOTERM_BP_FAT | GO:0019216~regulation of lipid metabolic process           | 6     | 0.371   |                                             | 1.50            |
| GOTERM_BP_FAT | GO:0019217~regulation of fatty acid metabolic process      | 3     | 0.527   |                                             | 1.71            |
| GOTERM_BP_FAT | GO:0010565~regulation of cellular ketone metabolic process | 3     | 0.609   |                                             | 1.47            |

**Annotation Cluster: HOMEODOMAIN**

| Category        | Term                                     | Count | p Value | Genes                                                                                                                   | Fold Enrichment |
|-----------------|------------------------------------------|-------|---------|-------------------------------------------------------------------------------------------------------------------------|-----------------|
| UP_SEQ_FEATURE  | DNA-binding region:Homeobox              | 7     | 0.661   | HESX1, BARX2, LMX1B, HOXA10, PAX3, POU1F1, HDX, VSX1, POGZ, EPAS1, RXRA, MBD2, PRDM16, FOXF1, TAL1, NR2F6, SPIC, NFIL3, | 1.05            |
| SMART           | SM00389:HOX                              | 8     | 0.691   |                                                                                                                         | 1.00            |
| INTERPRO        | IPR017970:Homeobox, conserved site       | 8     | 0.702   |                                                                                                                         | 0.99            |
| INTERPRO        | IPR001356:Homeobox                       | 8     | 0.715   |                                                                                                                         | 0.98            |
| INTERPRO        | IPR012287:Homeobox-related               | 8     | 0.727   |                                                                                                                         | 0.96            |
| SP_PIR_KEYWORDS | Homeobox                                 | 8     | 0.744   |                                                                                                                         | 0.95            |
| GOTERM_MF_FAT   | GO:0043565~sequence-specific DNA binding | 17    | 0.929   |                                                                                                                         | 0.77            |

**Annotation Cluster: TRANSCRIPTION FACTOR ACTIVITY**

| Category        | Term                                                  | Count | p Value | Genes                                                                                                                                                                                                                                                                                                                                                                                                                                                                                                                                                                                                                                                                                                                                                                                                                                                                                                                                                                                                                                                                                                                                                                                                     | Fold Enrichment |
|-----------------|-------------------------------------------------------|-------|---------|-----------------------------------------------------------------------------------------------------------------------------------------------------------------------------------------------------------------------------------------------------------------------------------------------------------------------------------------------------------------------------------------------------------------------------------------------------------------------------------------------------------------------------------------------------------------------------------------------------------------------------------------------------------------------------------------------------------------------------------------------------------------------------------------------------------------------------------------------------------------------------------------------------------------------------------------------------------------------------------------------------------------------------------------------------------------------------------------------------------------------------------------------------------------------------------------------------------|-----------------|
| SP_PIR_KEYWORDS | transcription regulation                              | 71    | 0.554   | ENY2, ZBTB33, CHURC1, ARID4A, ARNT2, NAA15, PAX3, MAF1, TMF1, TAF7L, KDM1B, GABPB1, ZFP91, BARX2, NR2F6, SPIC, NFIL3, KDM5B, SERTAD2, ZNF101, ELP4, SNAPCS, RREB1, YY1, RXRA, SOX11, ZFX, HDAC10, HMG20B, BANP, LPIN2, MBD2, PPARGC1A, ZNF335, FRY, SUZ12, ZFP82, BAZ1B, RFC1, MLLT10, MNDA, KRTPA1-1, PRDM2, WASL, VOPP1, TFAP2E, ASCL4, CRT3, SUPT3H, TAF9B, ZNF511, PRDM16, POU1F1, CCDC59, MED12L, ZNF32, HESX1, TAL1, CIR1, HOXA10, CHD1, RUXN1, SLC30A9, AEBP2, ZNF1M2, EPAS1, LMX1B, KLF15, VSX1, FOXP1, CNTF, TBL1Y, ADH1A, HDK, BUD31, RNF6, FABP4, DZP1, HIST1H2BL, INTS6, PRKACB, CCNA2, C15ORF55, MTUS1, DHX32, CE21, HZAF1, RPS19, CELF4, NEK9, PELO, BIVM, HMG81, HDLB, LMNB1, NFKBID, NEK1, CHX, TTC5, LIN28B, HIST1H4A, POLN, HIST1H4J, NXF5, HEATR1, NOP10, HNIL, PPH, MSL1, HIST1H3A, CPNE1, HIST1H3H, PLEKHA2, HIST4H4, SHOC2, GN3L3, CCNE2, DCAF13, DKC1, FANCI, IPMK, POGZ, HIST1H1C, PIK3C2A, HIST1H1A, G3BP1, LARP7, RIPPV2, DMC1, UTP3, UTP6, TSPYL1, DCLK3, DAZL, RSL24D1, HIST1H2BC, DAZ2, SUN2, CENPF, SYNPO2, SNAI1, RSNB1, DIS3, RP56KA5, RNF43, PSMG2, HIST1H2AI, HSPA4L, SH3BGR12, NOP58, SH3D19, SSNA1, TLR3, IL22, TARBP1, ACVR2B, REM2, ILS, MSTN, EDA2R, SFMBT1, IL22, | 1.00            |
| GOTERM_MF_FAT   | GO:0030528~transcription regulator activity           | 54    | 0.616   |                                                                                                                                                                                                                                                                                                                                                                                                                                                                                                                                                                                                                                                                                                                                                                                                                                                                                                                                                                                                                                                                                                                                                                                                           | 0.99            |
| SP_PIR_KEYWORDS | Transcription                                         | 71    | 0.631   |                                                                                                                                                                                                                                                                                                                                                                                                                                                                                                                                                                                                                                                                                                                                                                                                                                                                                                                                                                                                                                                                                                                                                                                                           | 0.98            |
| SP_PIR_KEYWORDS | nucleus                                               | 143   | 0.771   |                                                                                                                                                                                                                                                                                                                                                                                                                                                                                                                                                                                                                                                                                                                                                                                                                                                                                                                                                                                                                                                                                                                                                                                                           | 0.96            |
| GOTERM_MF_FAT   | GO:0003700~transcription factor activity              | 32    | 0.798   |                                                                                                                                                                                                                                                                                                                                                                                                                                                                                                                                                                                                                                                                                                                                                                                                                                                                                                                                                                                                                                                                                                                                                                                                           | 0.91            |
| GOTERM_BP_FAT   | GO:0045449~regulation of transcription                | 87    | 0.806   |                                                                                                                                                                                                                                                                                                                                                                                                                                                                                                                                                                                                                                                                                                                                                                                                                                                                                                                                                                                                                                                                                                                                                                                                           | 0.93            |
| GOTERM_BP_FAT   | GO:0006355~regulation of transcription, DNA-dependent | 57    | 0.859   |                                                                                                                                                                                                                                                                                                                                                                                                                                                                                                                                                                                                                                                                                                                                                                                                                                                                                                                                                                                                                                                                                                                                                                                                           | 0.90            |
| GOTERM_BP_FAT   | GO:0051252~regulation of RNA metabolic process        | 58    | 0.870   |                                                                                                                                                                                                                                                                                                                                                                                                                                                                                                                                                                                                                                                                                                                                                                                                                                                                                                                                                                                                                                                                                                                                                                                                           | 0.89            |
| GOTERM_BP_FAT   | GO:0006350~transcription                              | 67    | 0.890   |                                                                                                                                                                                                                                                                                                                                                                                                                                                                                                                                                                                                                                                                                                                                                                                                                                                                                                                                                                                                                                                                                                                                                                                                           | 0.89            |
| SP_PIR_KEYWORDS | dna-binding                                           | 56    | 0.924   |                                                                                                                                                                                                                                                                                                                                                                                                                                                                                                                                                                                                                                                                                                                                                                                                                                                                                                                                                                                                                                                                                                                                                                                                           | 0.86            |
| GOTERM_MF_FAT   | GO:0003677~DNA binding                                | 70    | 0.975   |                                                                                                                                                                                                                                                                                                                                                                                                                                                                                                                                                                                                                                                                                                                                                                                                                                                                                                                                                                                                                                                                                                                                                                                                           | 0.83            |
